# Supplementary material for: Diterpenoids from the Brown Alga Rugulopteryx okamurae and Their Anti-Inflammatory Activity
Source: MDPI journal article supplement (doi:10.3390/md19120677), 2021-11-27
Supplement: s1 [file s1]

## Supplementary material

### Diterpenoids from the Brown Alga *Rugulopteryx okamurae* and their Anti-inflammatory Activity

Belén Cuevas<sup>1,2</sup>, Ana I. Arroba<sup>2,3</sup>, Carolina de los Reyes<sup>1</sup>, Laura Gómez-Jaramillo<sup>2</sup>, M<sup>a</sup> Carmen González-Montelongo<sup>2</sup> and Eva Zubía<sup>1,\*</sup>

<sup>1</sup> Departamento de Química Orgánica, Facultad de Ciencias del Mar y Ambientales, Universidad de Cádiz, 11510-Puerto Real (Cádiz), Spain; belen.cuevas@inibica.es (B.C.), carolina.dereyes@uca.es (C.D.L.R.), eva.zubia@uca.es (E.Z.)

<sup>2</sup> Unidad de Investigación, Instituto de Investigación e Innovación Biomédica de Cádiz (INiBICA), Hospital Universitario Puerta del Mar, Avda. Ana de Viya 21, 11009-Cádiz, Spain; anaarroba@gmail.com (A.I.A.), laugomjar@gmail.com (L.G.J.), mcmontel@gmail.com (M.C.G.M)

<sup>3</sup> Departamento de Endocrinología y Nutrición, Hospital Universitario Puerta del Mar, Ana de Viya 21, 11009-Cádiz, Spain.

\*Correspondence: eva.zubia@uca.es

**Figure S1.** <sup>1</sup>H NMR spectrum (500 MHz, CD<sub>3</sub>OD) of rugukadiol A (1)

**Figure S2.** <sup>13</sup>C NMR spectrum (125 MHz, CD<sub>3</sub>OD) of rugukadiol A (1)

**Figure S3.** <sup>1</sup>H NMR spectrum (500 MHz, CD<sub>3</sub>OD) of rugukamural A (2)

**Figure S4.** <sup>13</sup>C NMR spectrum (125 MHz, CD<sub>3</sub>OD) of rugukamural A (2)

**Figure S5.** <sup>1</sup>H NMR spectrum (500 MHz, CD<sub>3</sub>OD) of rugukamural B (3)

**Figure S6.** <sup>13</sup>C NMR spectrum (125 MHz, CD<sub>3</sub>OD) of rugukamural B (3)

**Figure S7.** <sup>1</sup>H NMR spectrum (500 MHz, CD<sub>3</sub>OD) of rugukamural C (4)

**Figure S8.** <sup>13</sup>C NMR spectrum (125 MHz, CD<sub>3</sub>OD) of rugukamural C (4)

**Figure S9.** <sup>1</sup>H NMR spectrum (500 MHz, CD<sub>3</sub>OD) of ruguloptone A (5)

**Figure S10.** <sup>13</sup>C NMR spectrum (125 MHz, CD<sub>3</sub>OD) of ruguloptone A (5)

**Figure S11.** <sup>1</sup>H NMR spectrum (500 MHz, CD<sub>3</sub>OD) of ruguloptone B (6)

**Figure S12.** <sup>13</sup>C NMR spectrum (125 MHz, CD<sub>3</sub>OD) of ruguloptone B (6)

**Figure S13.** <sup>1</sup>H NMR spectrum (500 MHz, CD<sub>3</sub>OD) of ruguloptone C (7)

**Figure S14.** <sup>13</sup>C NMR spectrum (125 MHz, CD<sub>3</sub>OD) of ruguloptone C (7)

**Figure S15.** <sup>1</sup>H NMR spectrum (500 MHz, CD<sub>3</sub>OD) of ruguloptone D (8)

**Figure S16.** <sup>13</sup>C NMR spectrum (125 MHz, CD<sub>3</sub>OD) of ruguloptone D (8)

**Figure S17.** <sup>1</sup>H NMR spectrum (500 MHz, CD<sub>3</sub>OD) of ruguloptone E (9)

**Figure S18.** <sup>13</sup>C NMR spectrum (125 MHz, CD<sub>3</sub>OD) of ruguloptone E (9)

**Figure S19.** <sup>1</sup>H NMR spectrum (500 MHz, CD<sub>3</sub>OD) of ruguloptone F (10)

**Figure S20.** <sup>13</sup>C NMR spectrum (125 MHz, CD<sub>3</sub>OD) of ruguloptone F (10)

**Figure S21.** Cell survival Bv.2 cells

**Figure S22.** Cell survival RAW 246.7 cells

S1

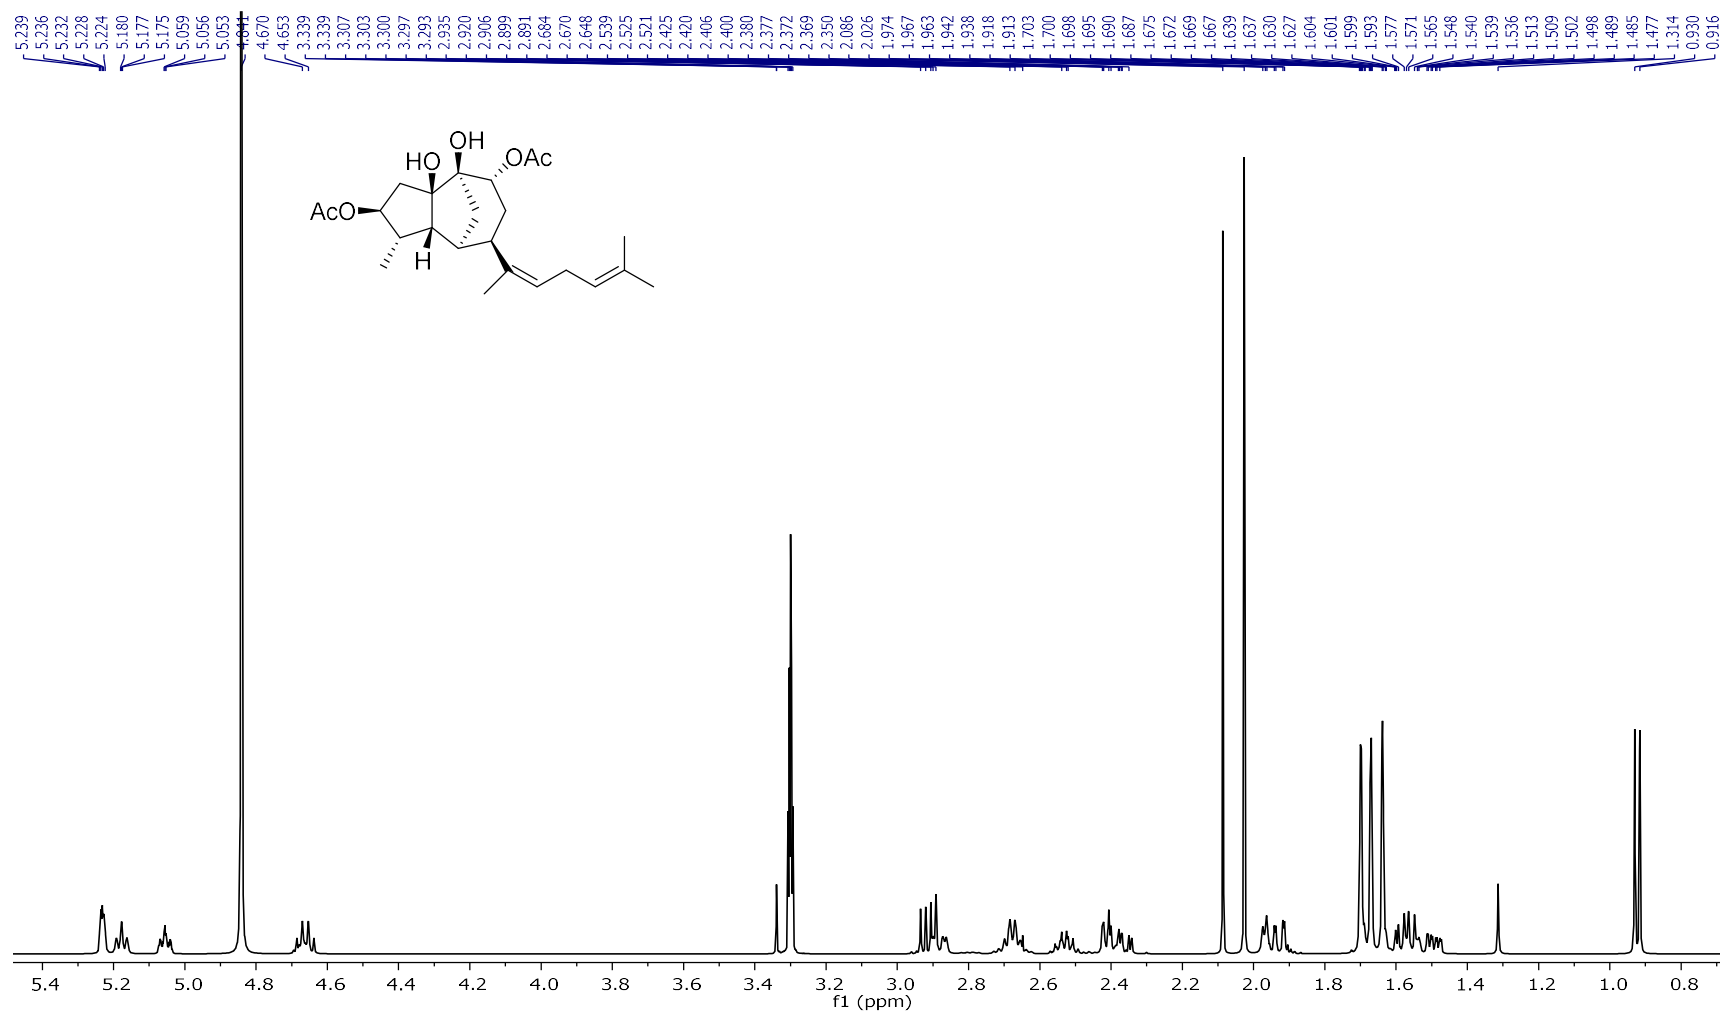

Figure S1.  $^1\text{H}$  NMR spectrum (500 MHz,  $\text{CD}_3\text{OD}$ ) of rugukadiol A (1)

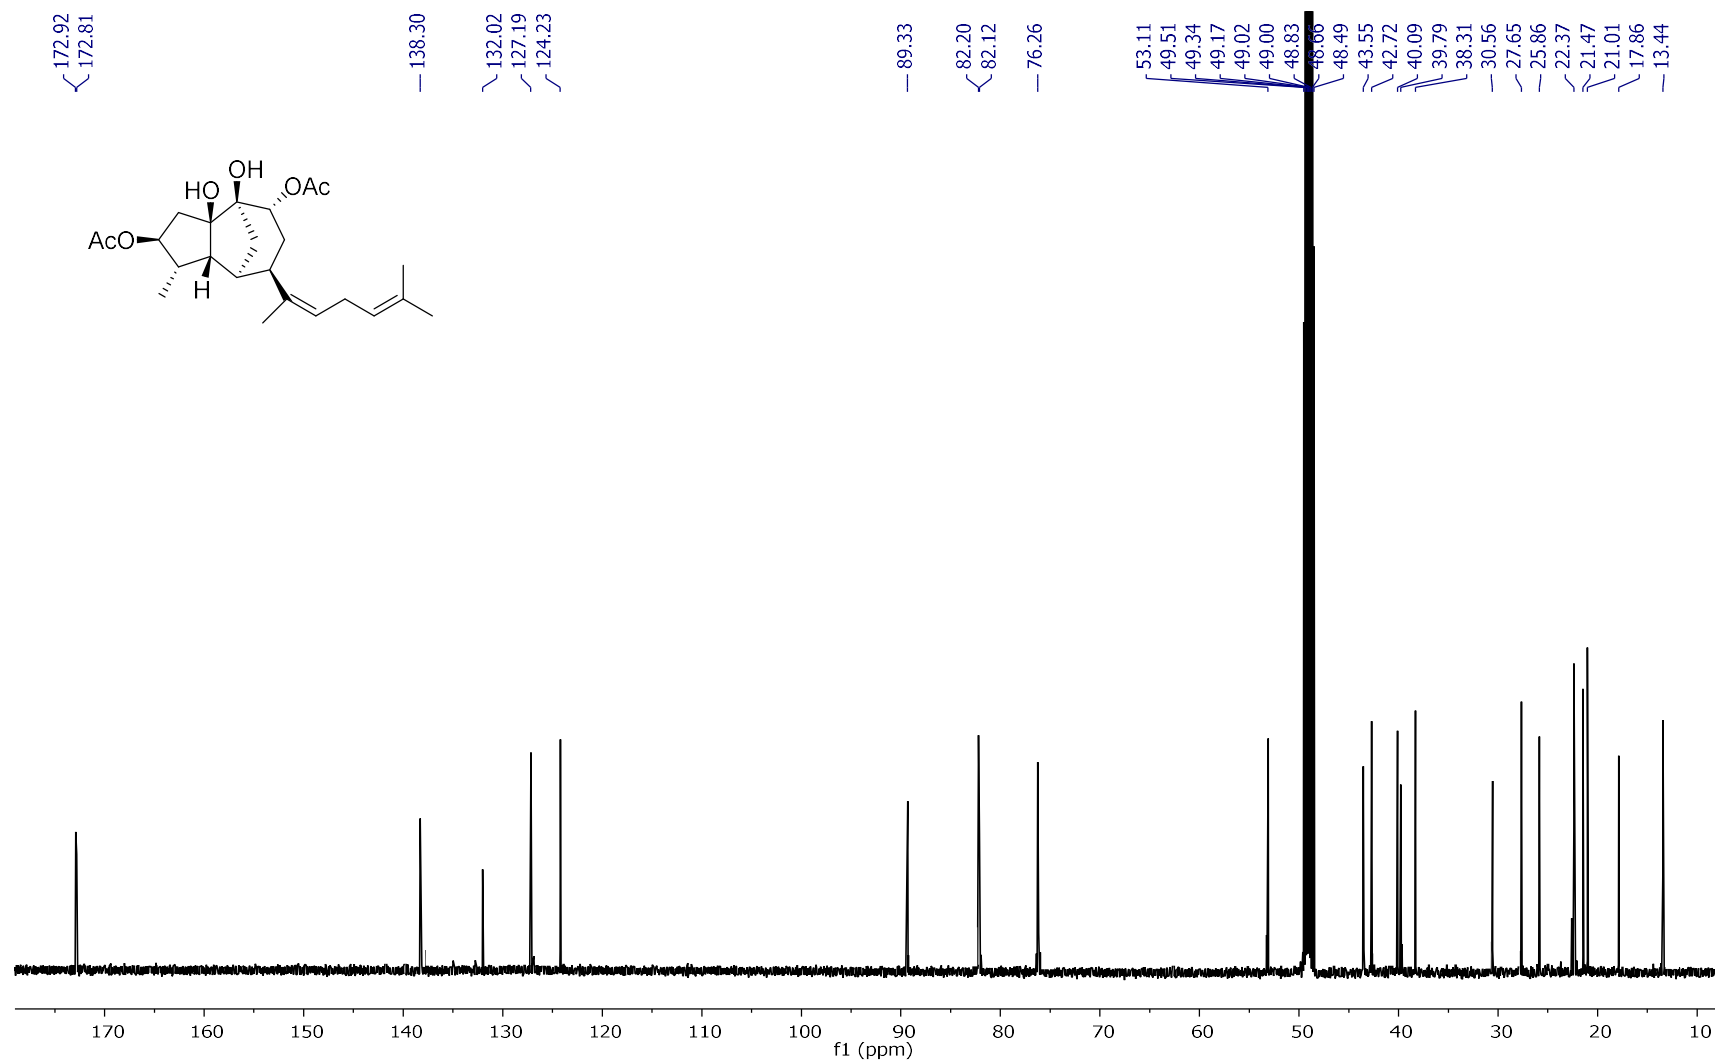

S2

Figure S2. <sup>13</sup>C NMR spectrum (125 MHz, CD<sub>3</sub>OD) of rugukadiol A (1)

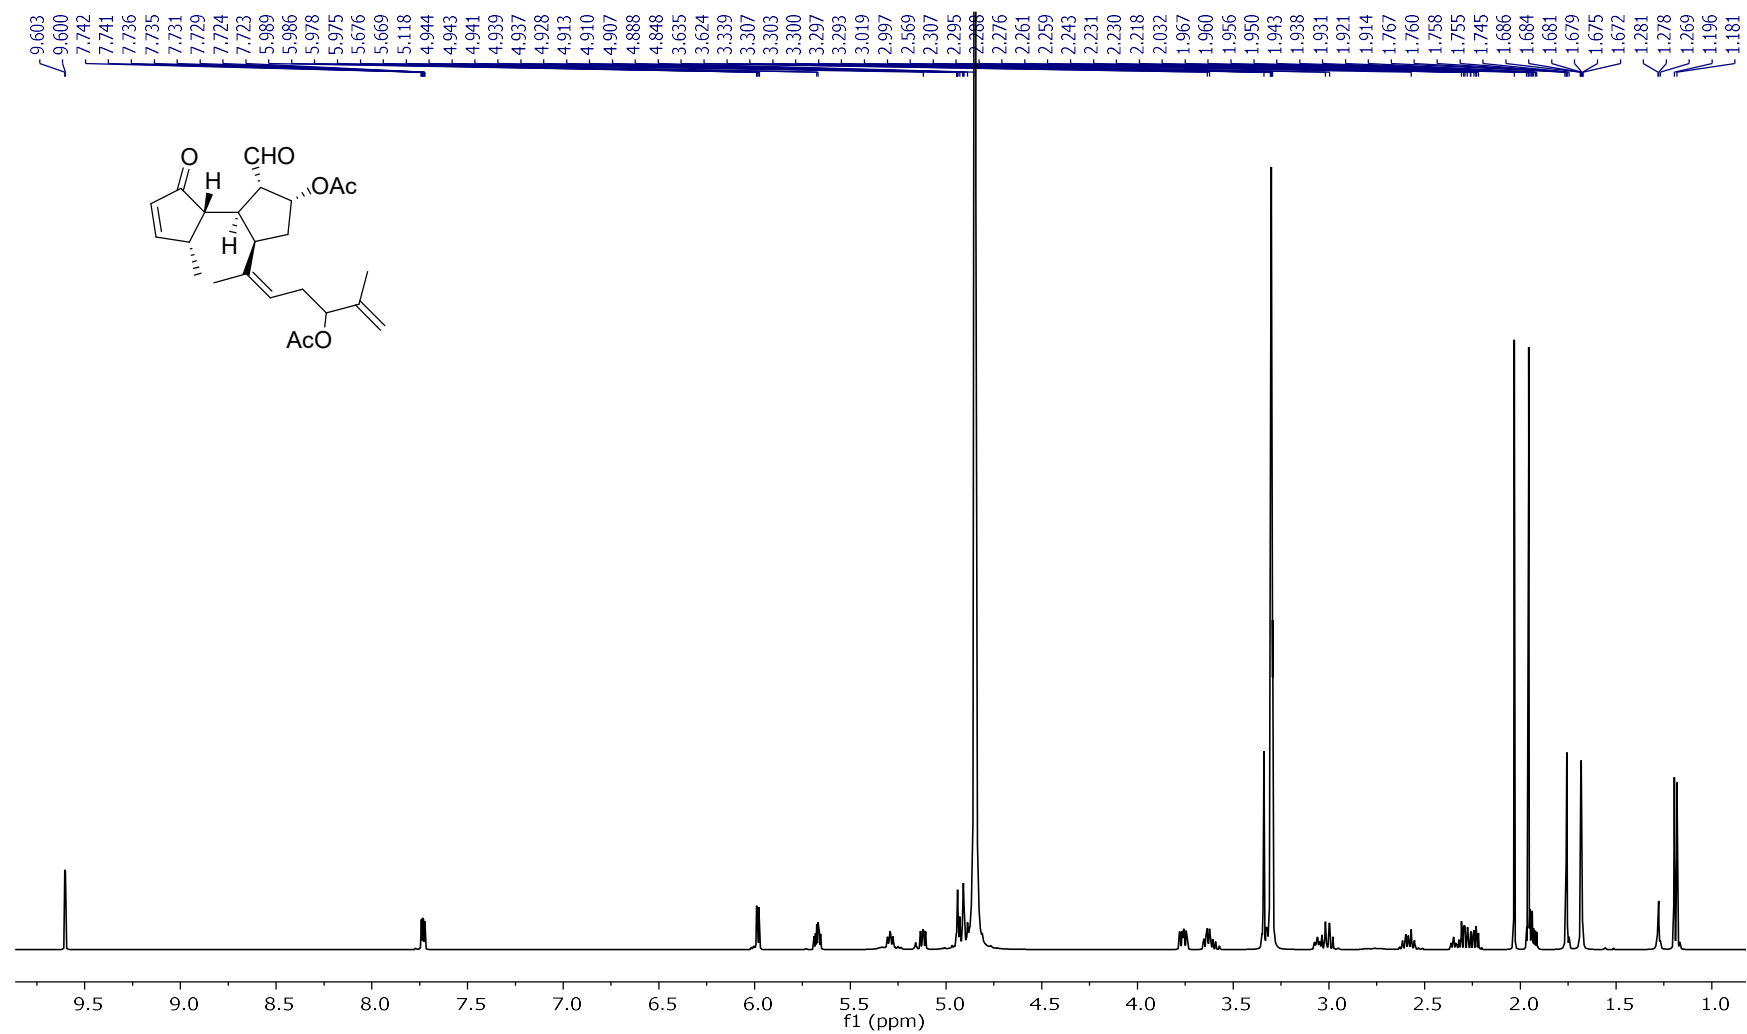

Figure S3. <sup>1</sup>H NMR spectrum (500 MHz, CD<sub>3</sub>OD) of rugukamural A (2)

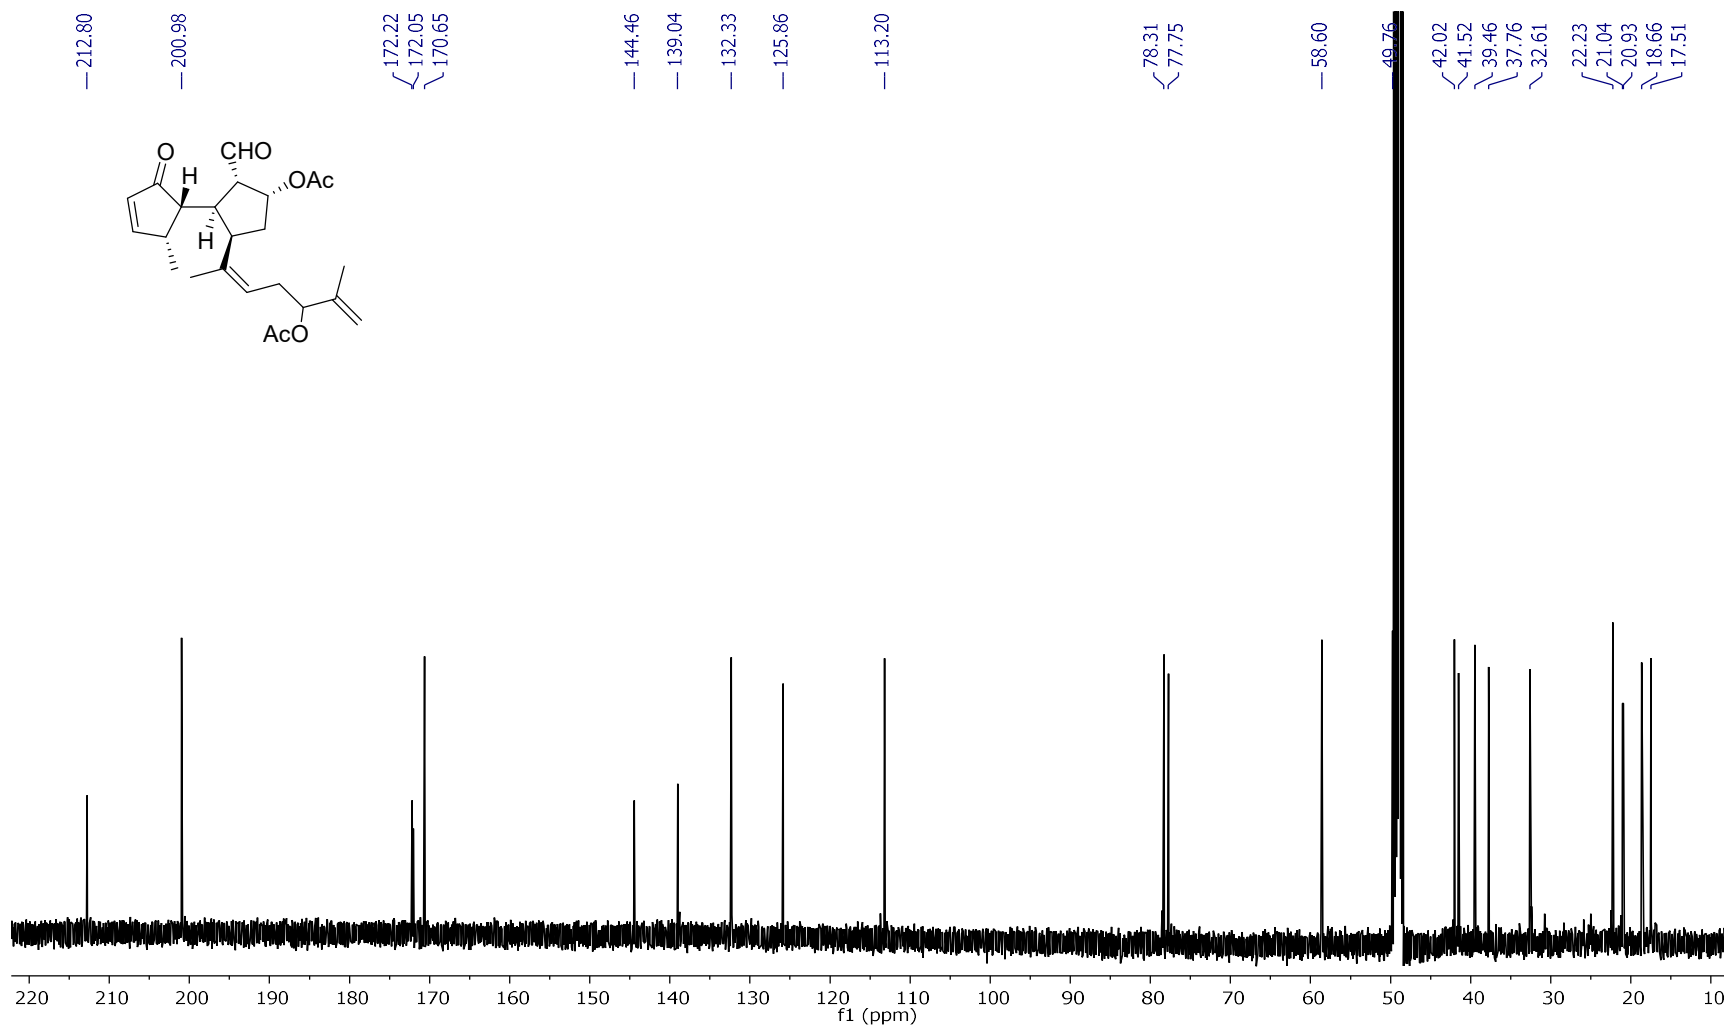

Figure S4.  $^{13}\text{C}$  NMR spectrum (125 MHz,  $\text{CD}_3\text{OD}$ ) of rugukamural A (2)

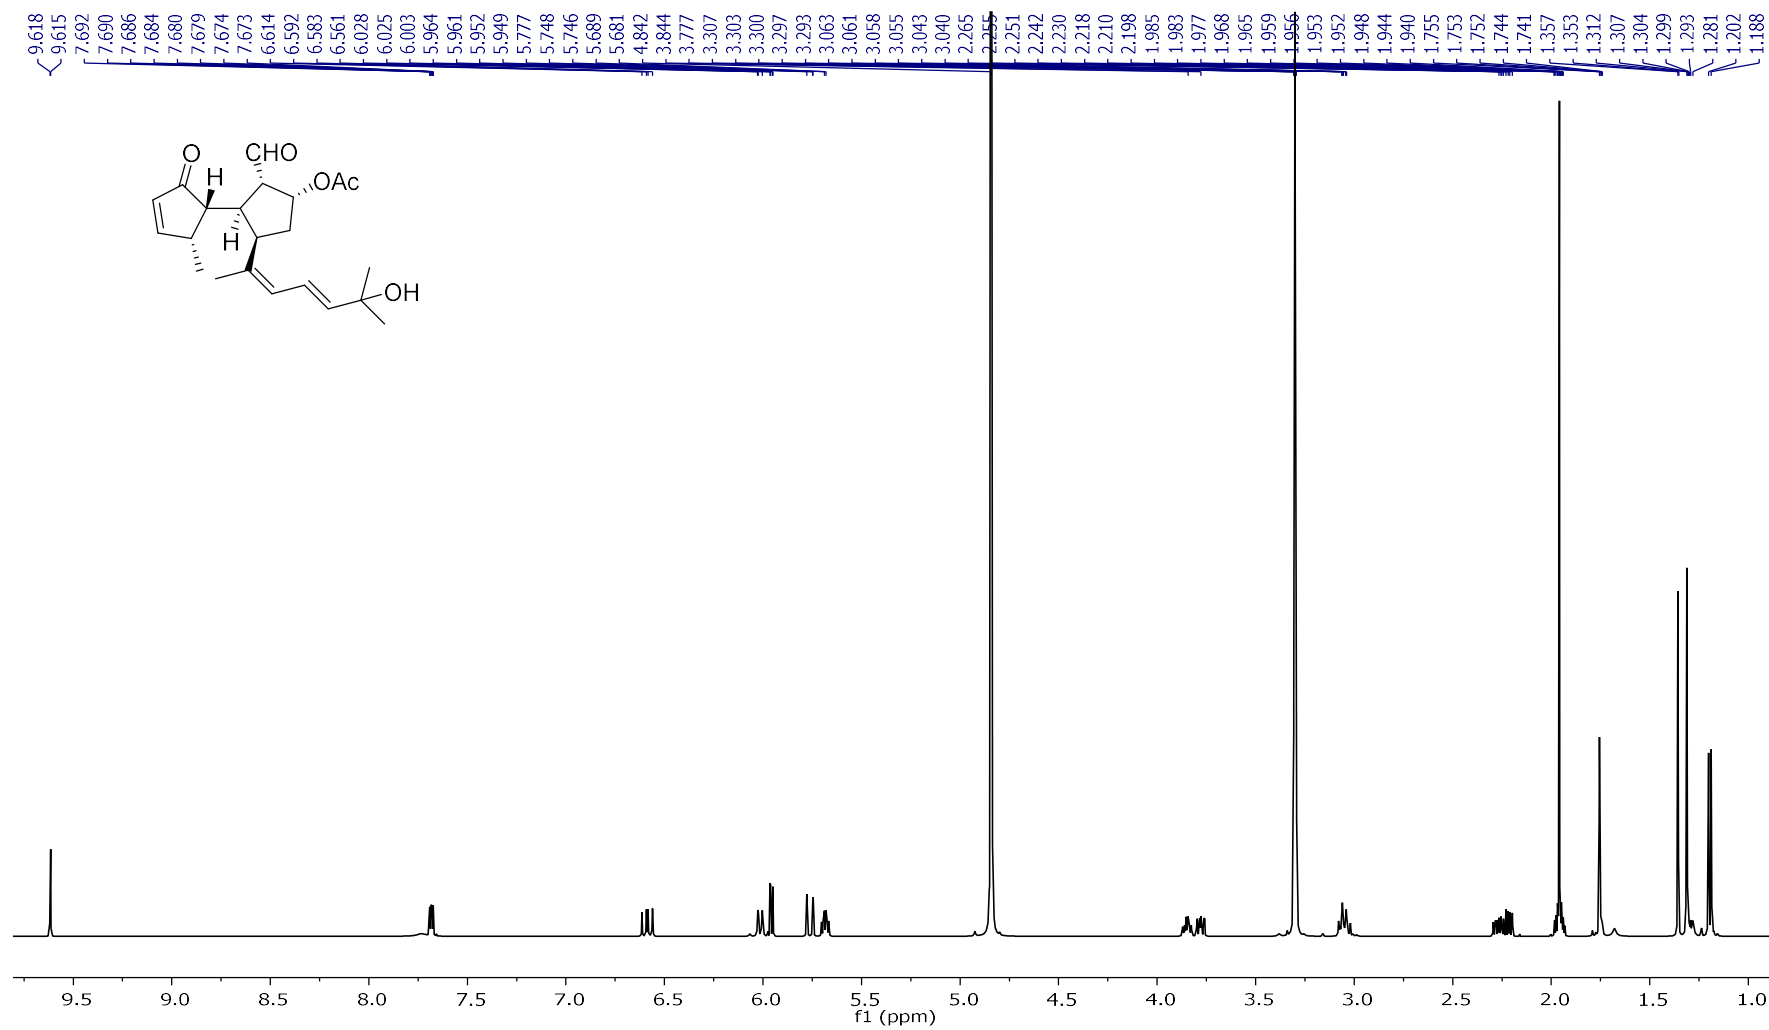

Figure S5. <sup>1</sup>H NMR spectrum (500 MHz, CD<sub>3</sub>OD) of rugukamural B (3)

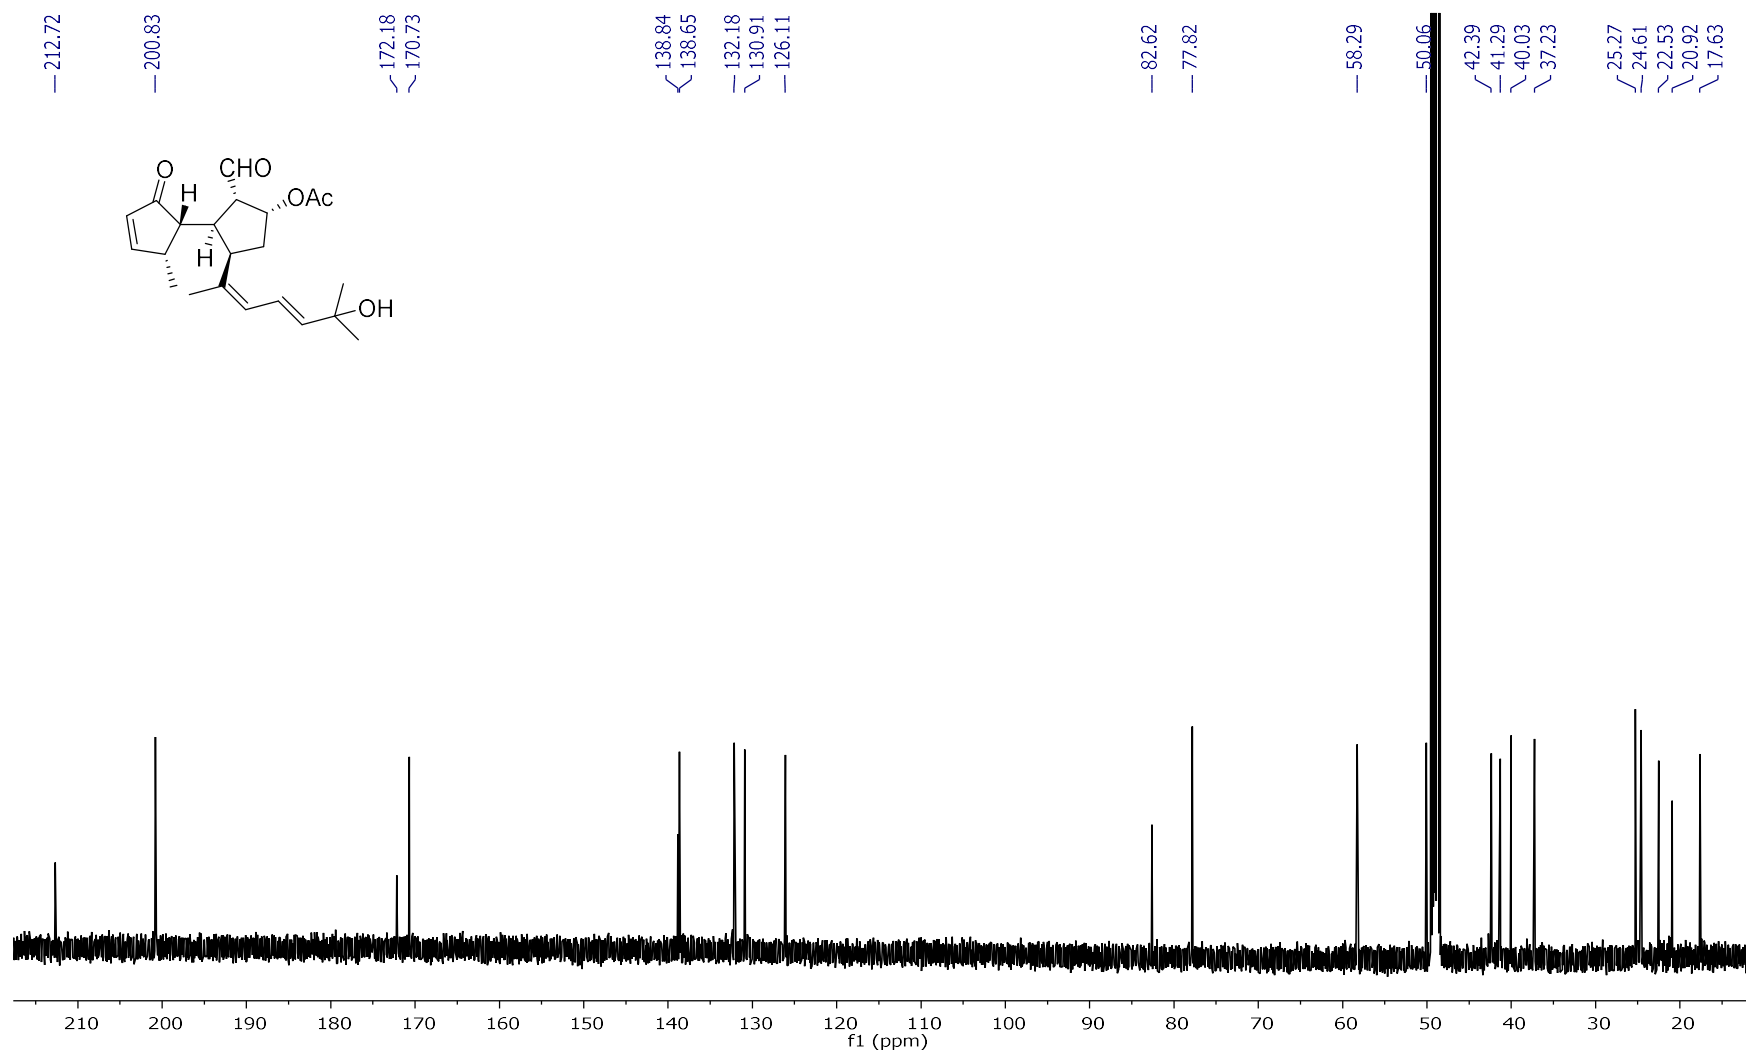

Figure S6. <sup>13</sup>C NMR spectrum (125 MHz, CD<sub>3</sub>OD) of rugukamural B (3)

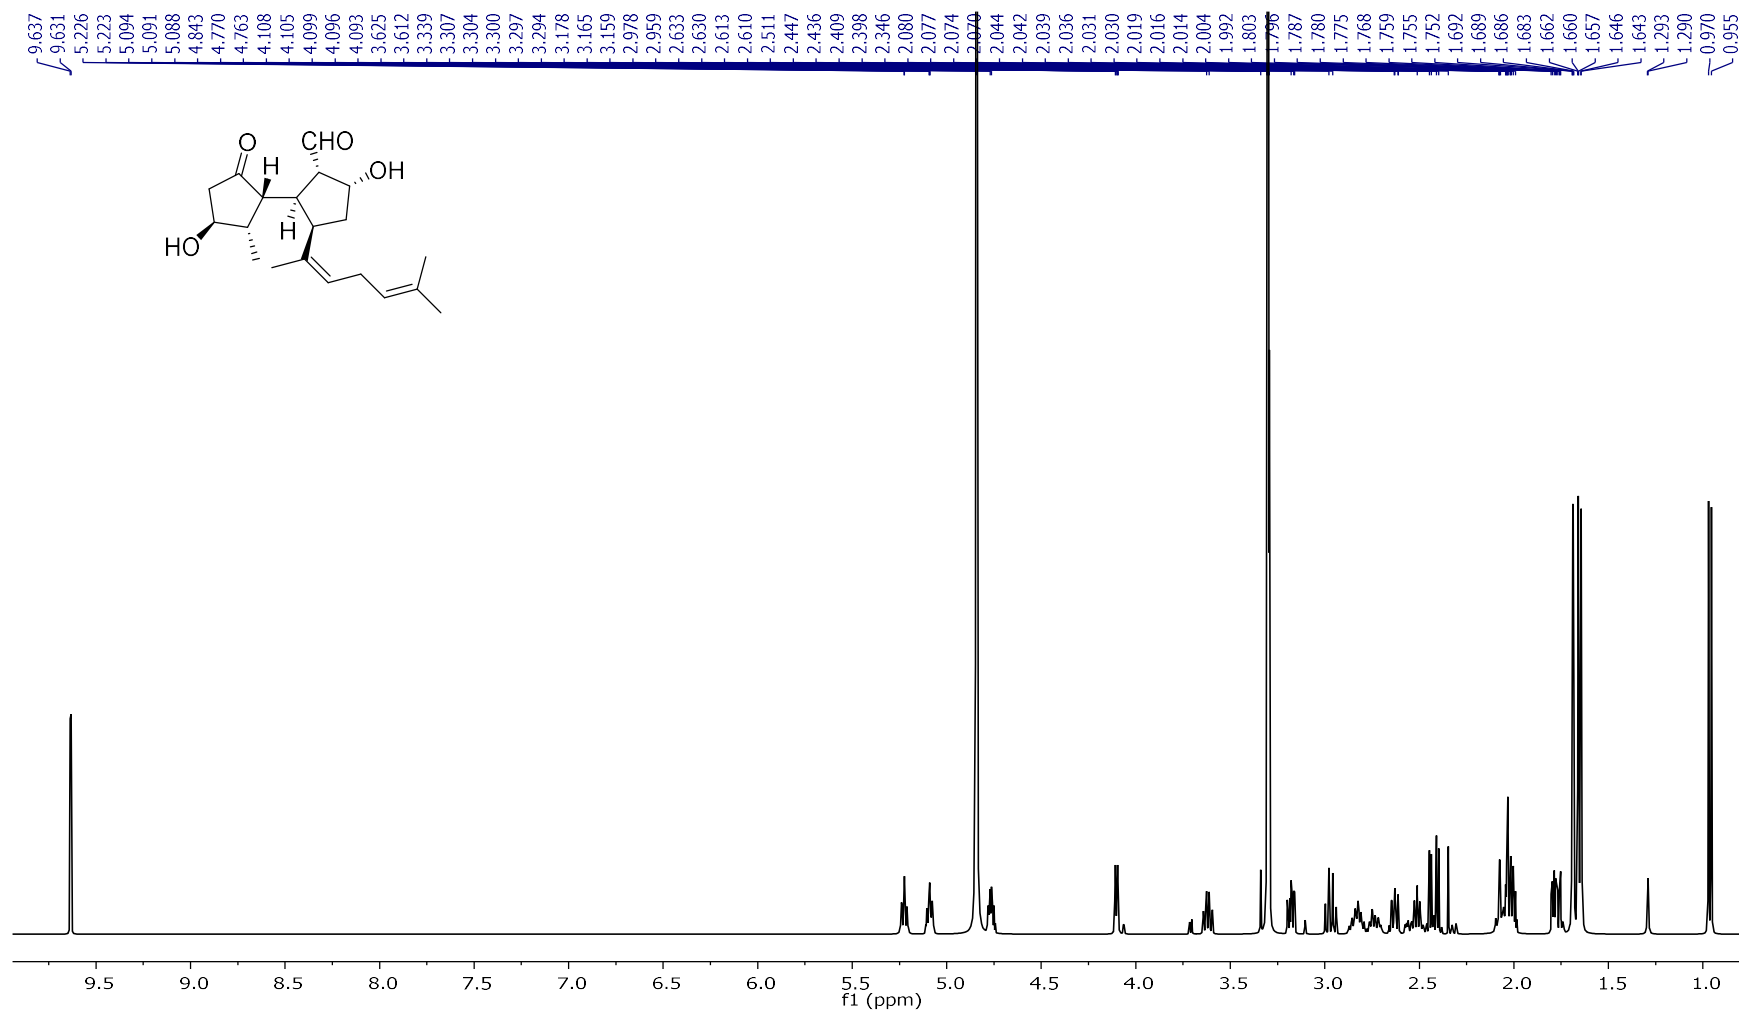

**Figure S7.** <sup>1</sup>H NMR spectrum (500 MHz, CD<sub>3</sub>OD) of rugukamural C (4)



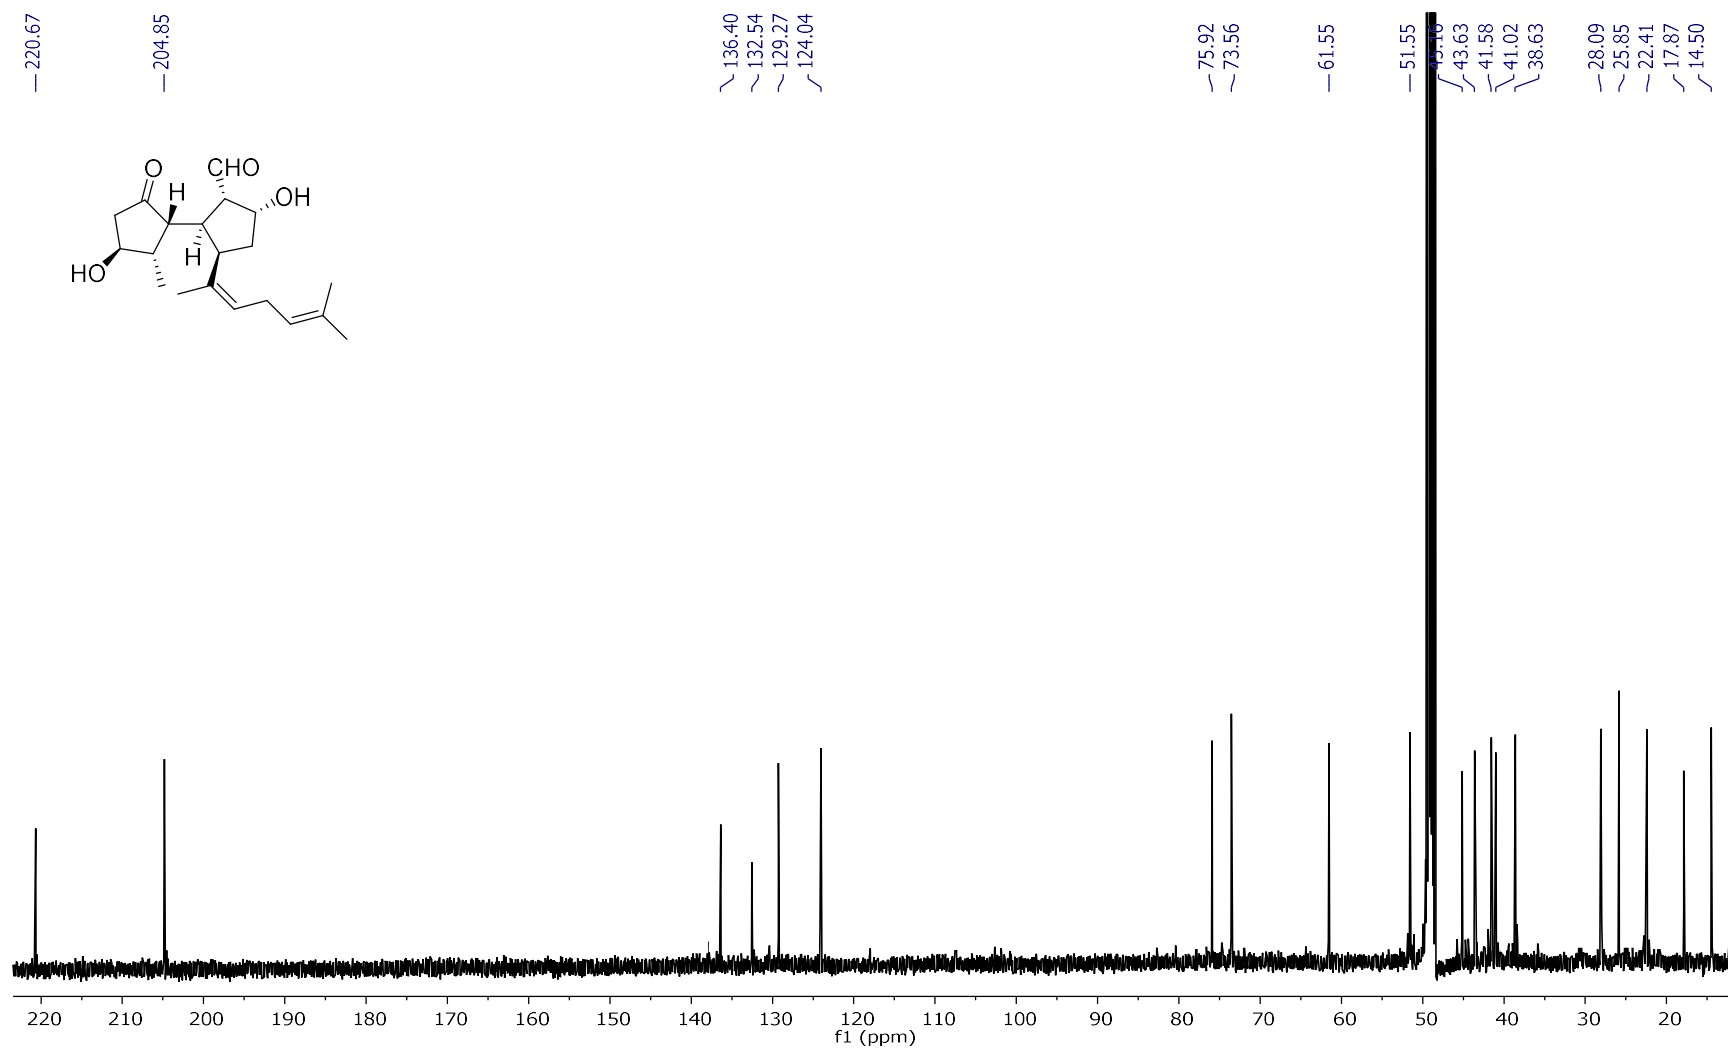

Figure S8.  $^{13}\text{C}$  NMR spectrum (125 MHz,  $\text{CD}_3\text{OD}$ ) of rugukamural C (4)

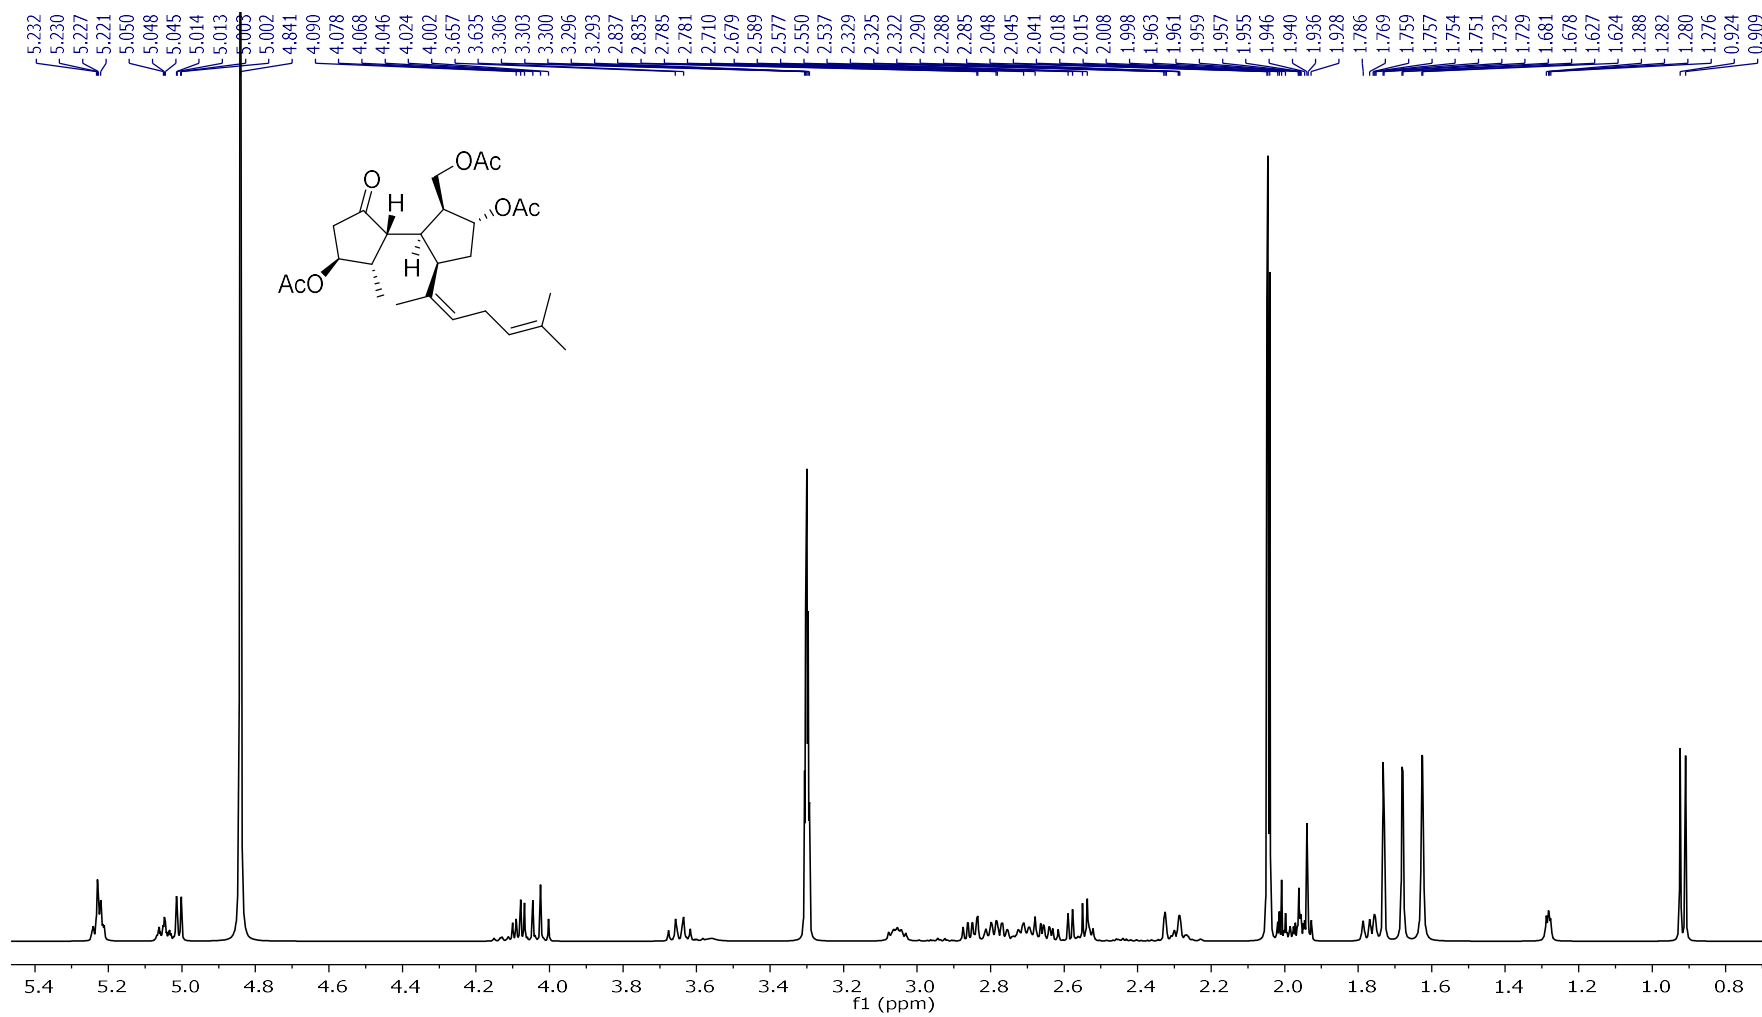

S9

Figure S9. <sup>1</sup>H NMR spectrum (500 MHz, CD<sub>3</sub>OD) of ruguloptone A (5)

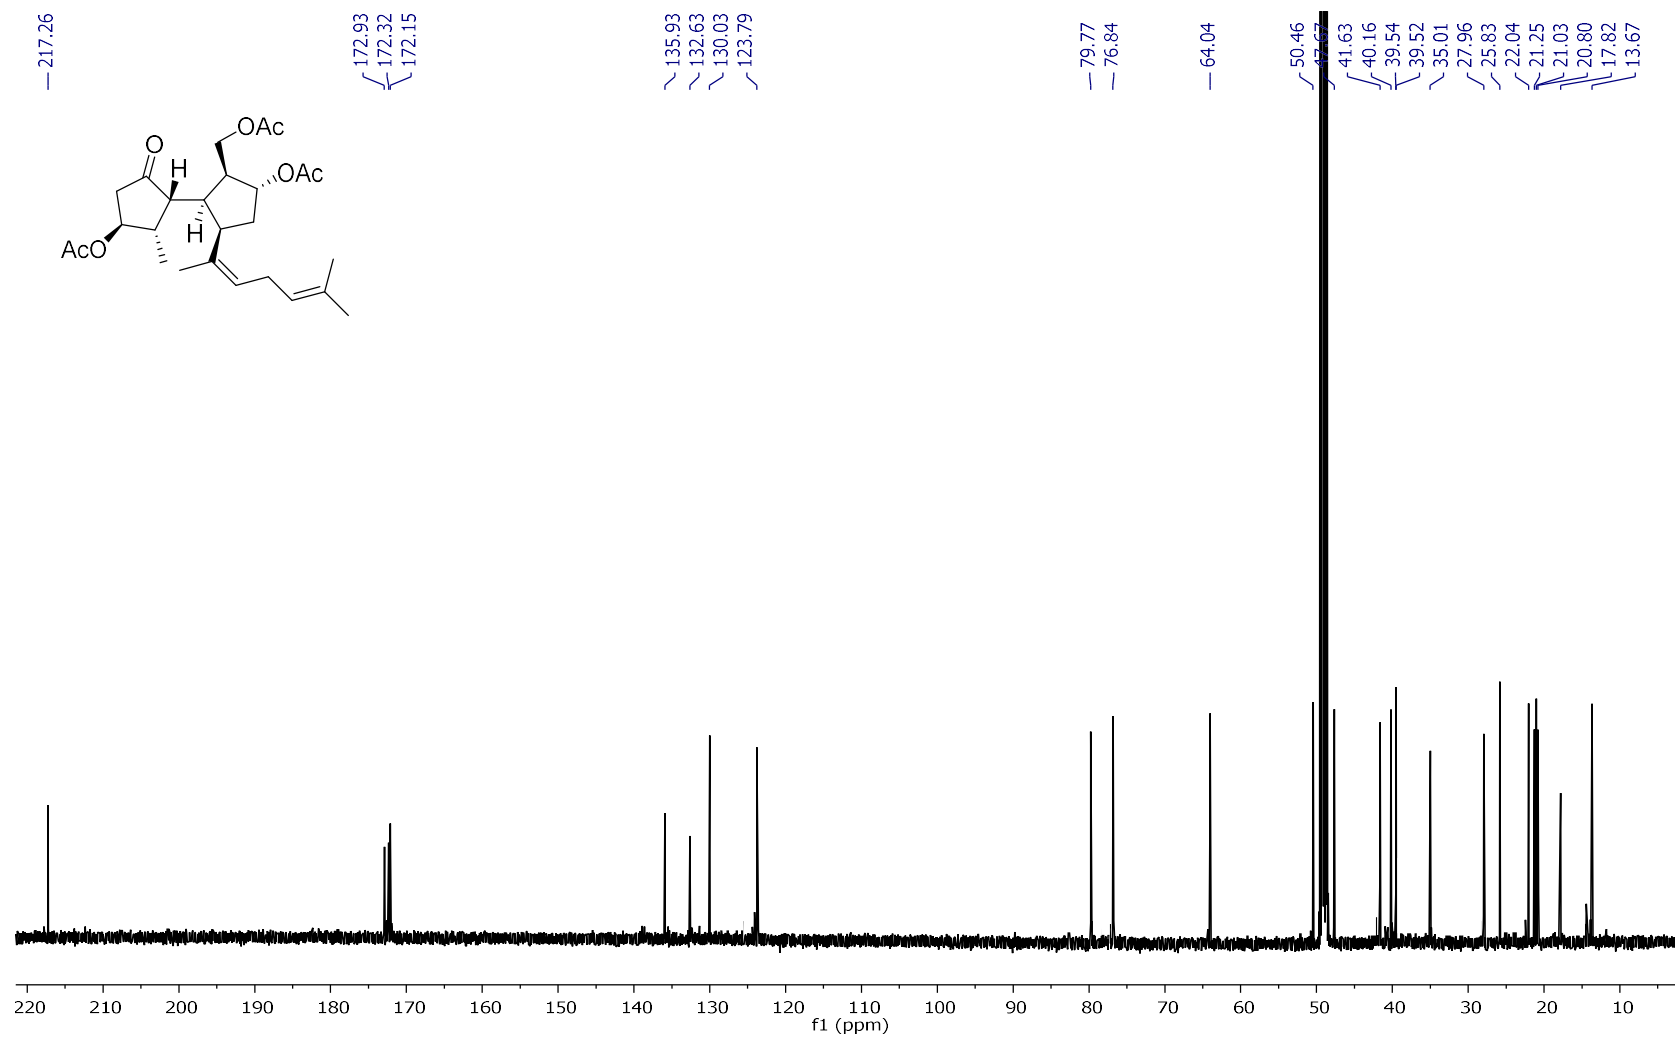

S10

Figure S10.  $^{13}\text{C}$  NMR spectrum (125 MHz,  $\text{CD}_3\text{OD}$ ) of ruguloptone A (5)

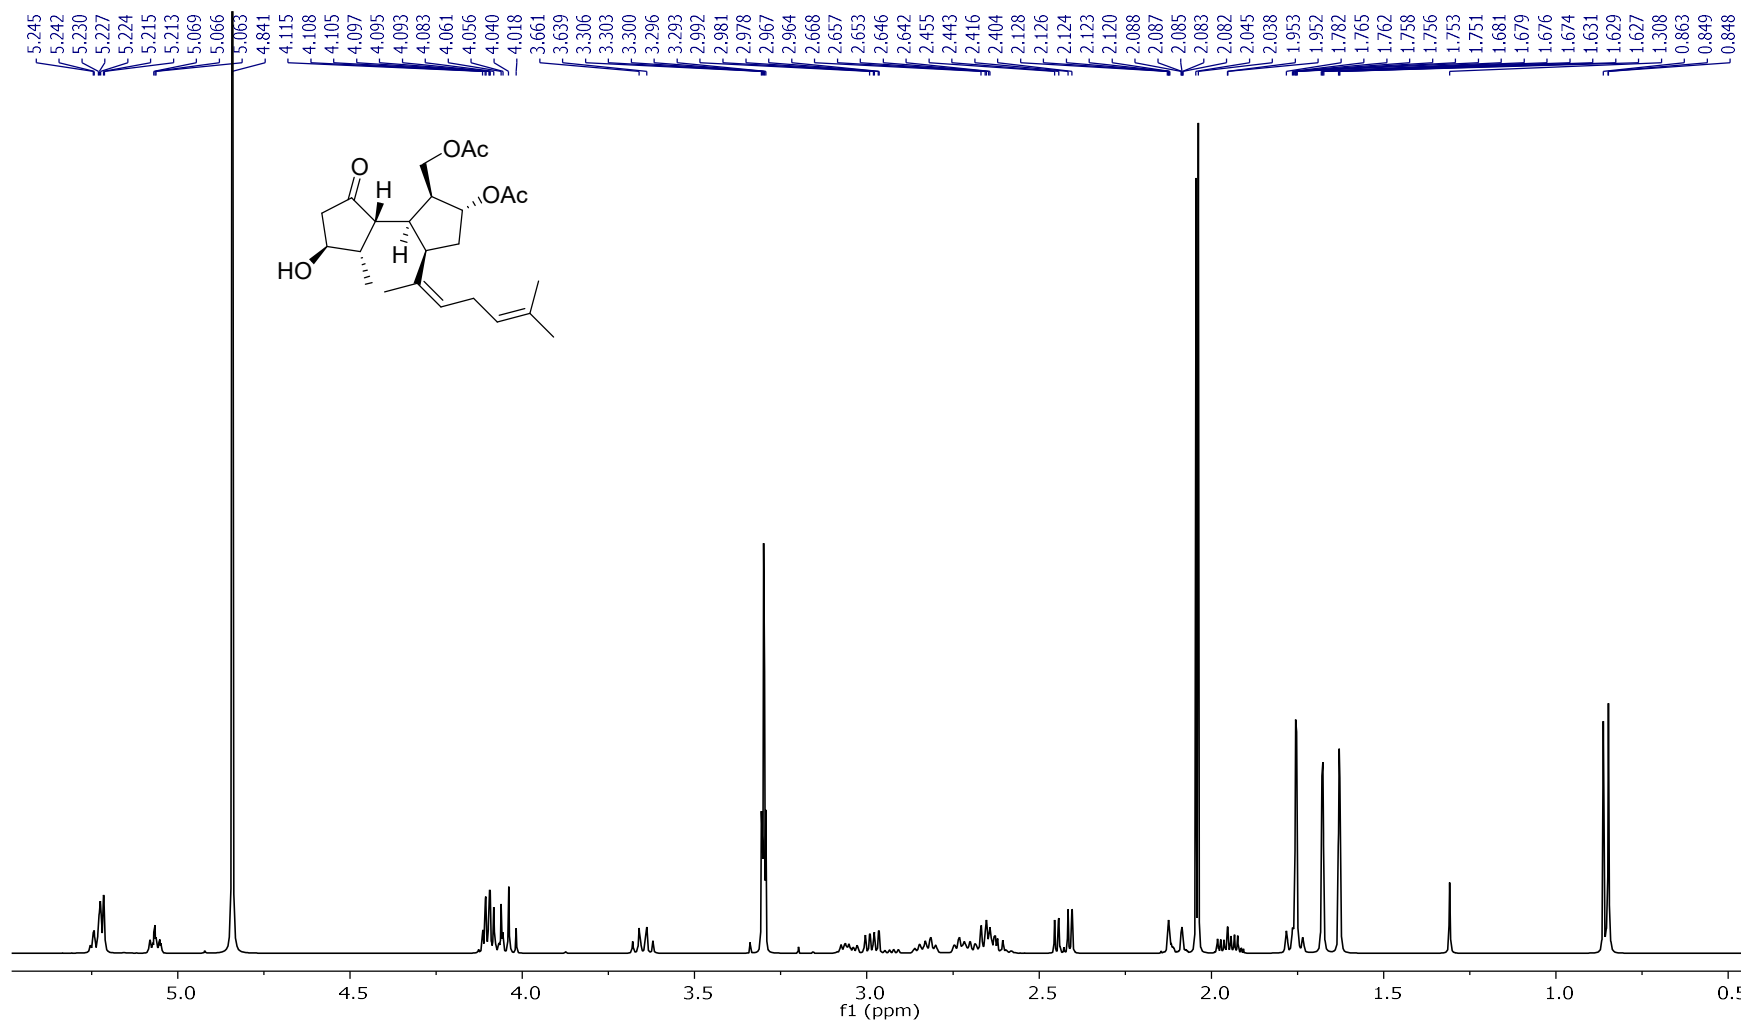

Figure S11.  $^1\text{H}$  NMR spectrum (500 MHz,  $\text{CD}_3\text{OD}$ ) of ruguloptone B (6)

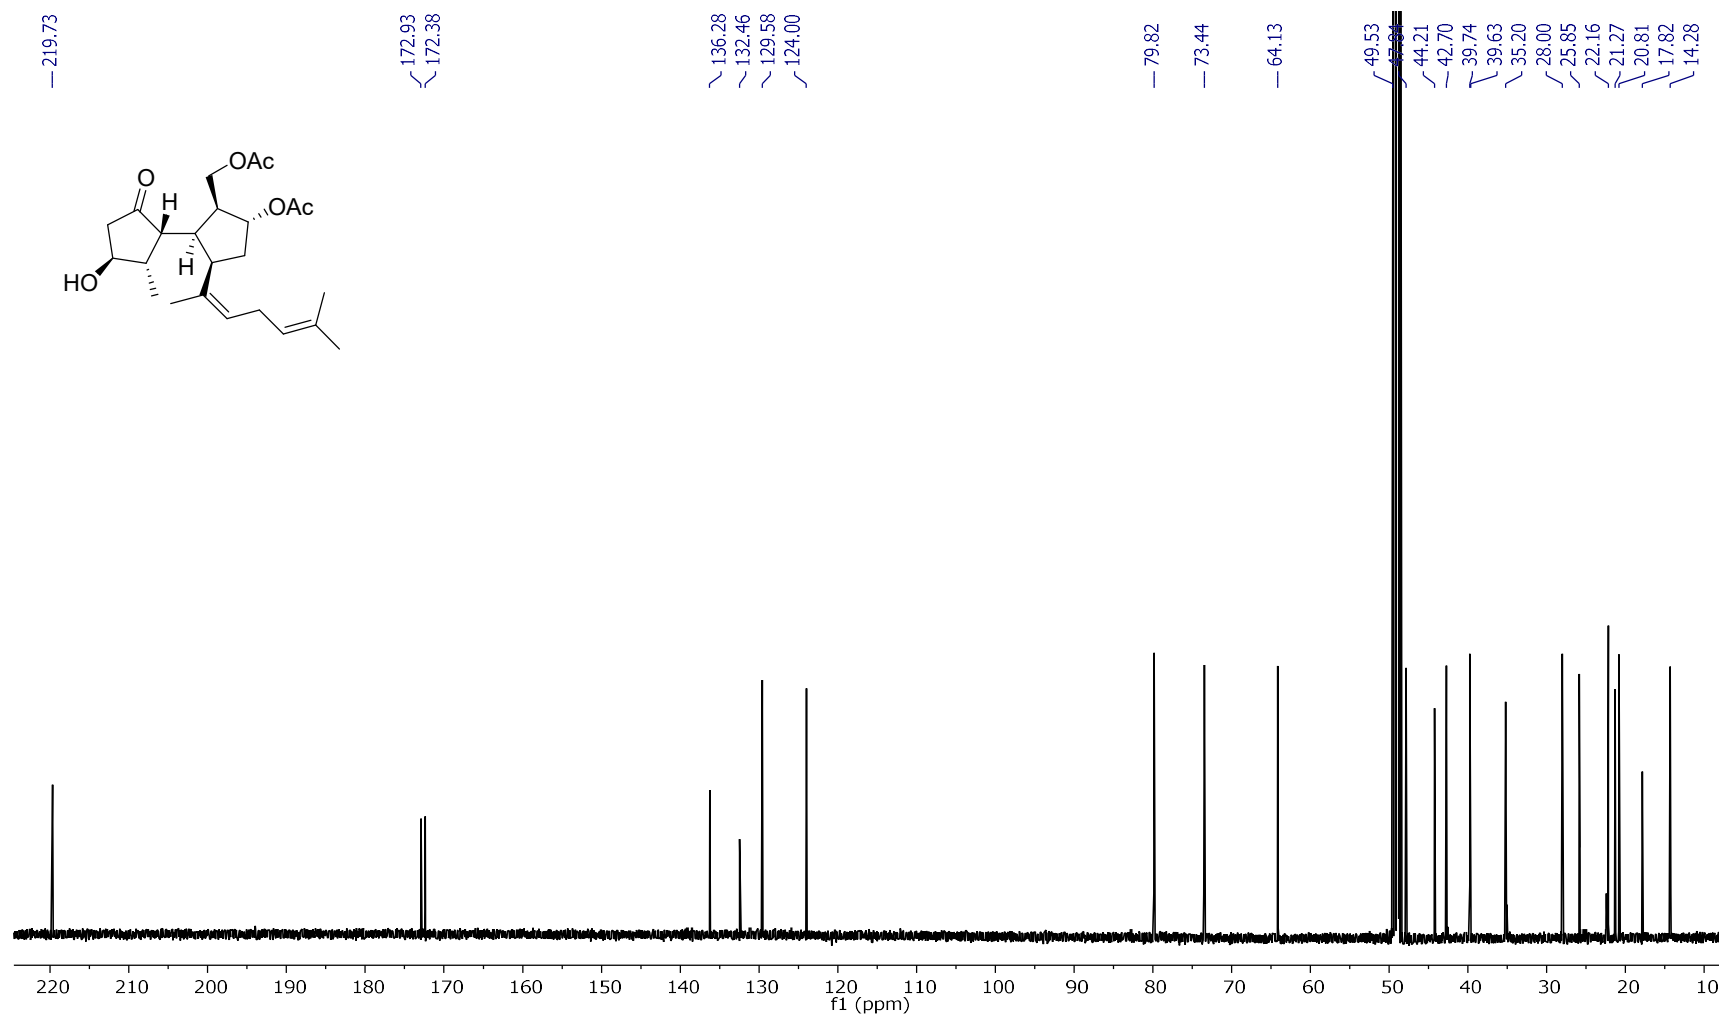

S12

Figure S12.  $^{13}\text{C}$  NMR spectrum (125 MHz,  $\text{CD}_3\text{OD}$ ) of ruguloptone B (**6**)

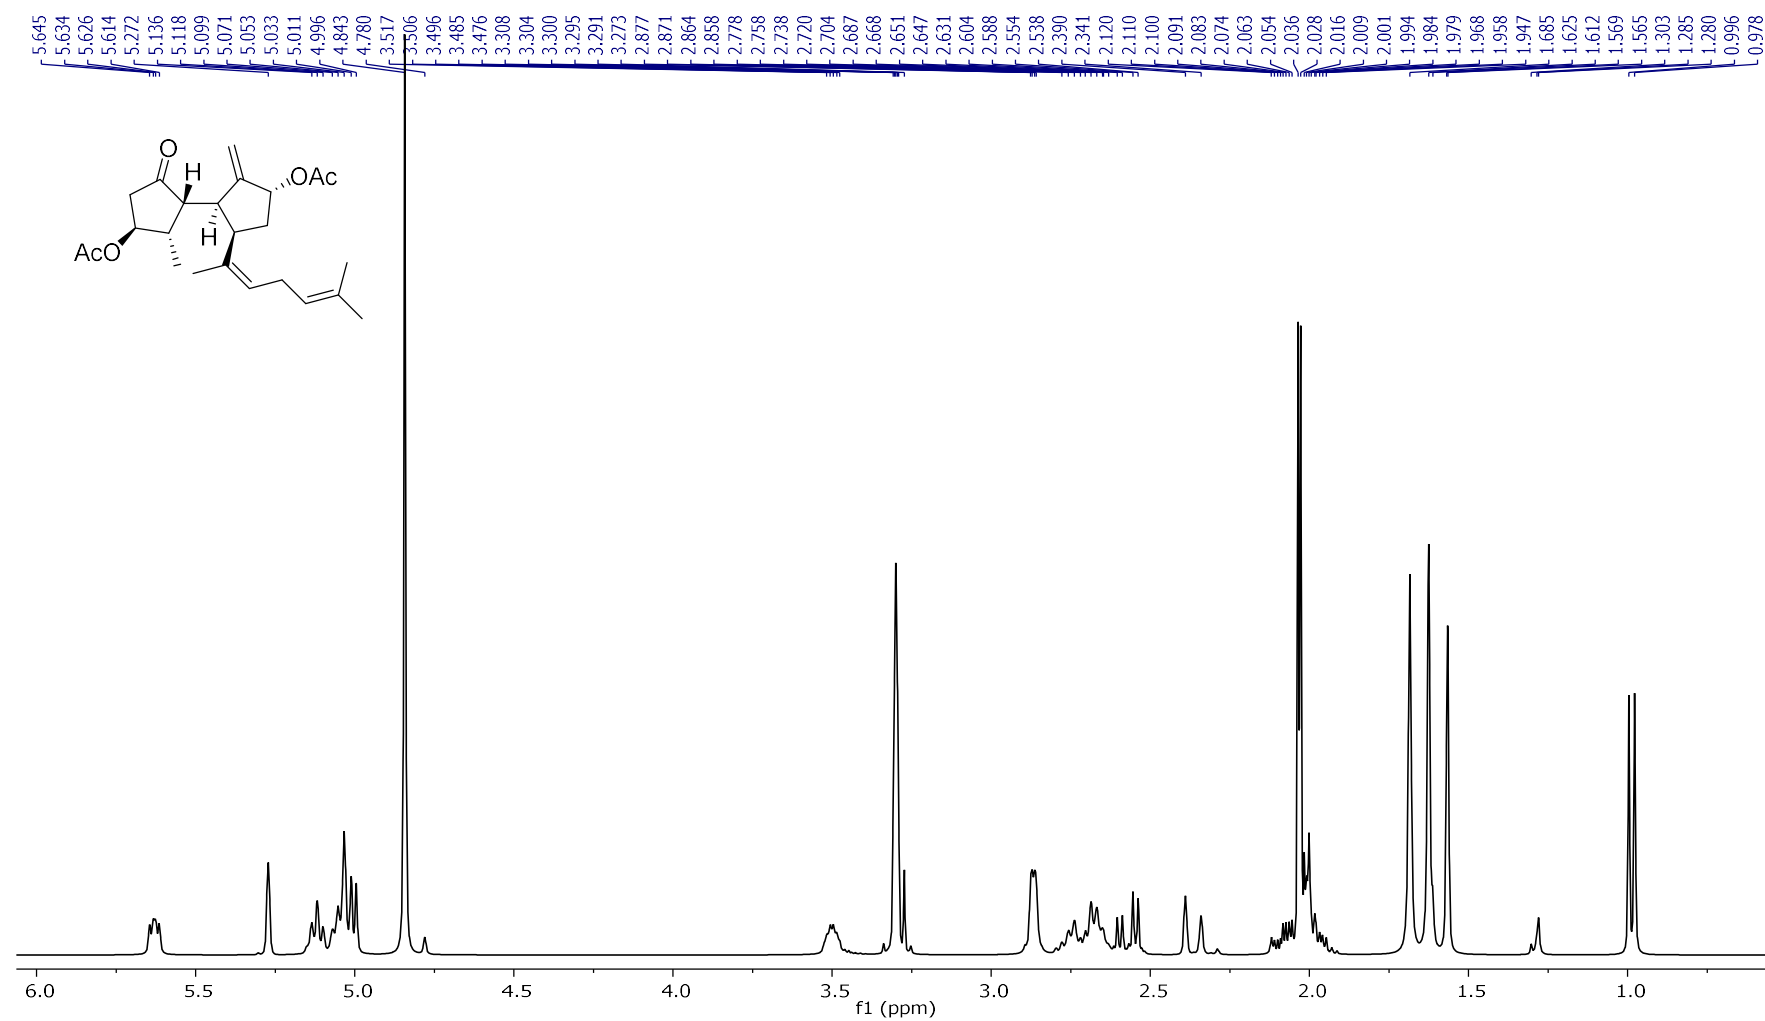

**Figure S13.** <sup>1</sup>H NMR spectrum (500 MHz, CD<sub>3</sub>OD) of ruguloptone C (7)

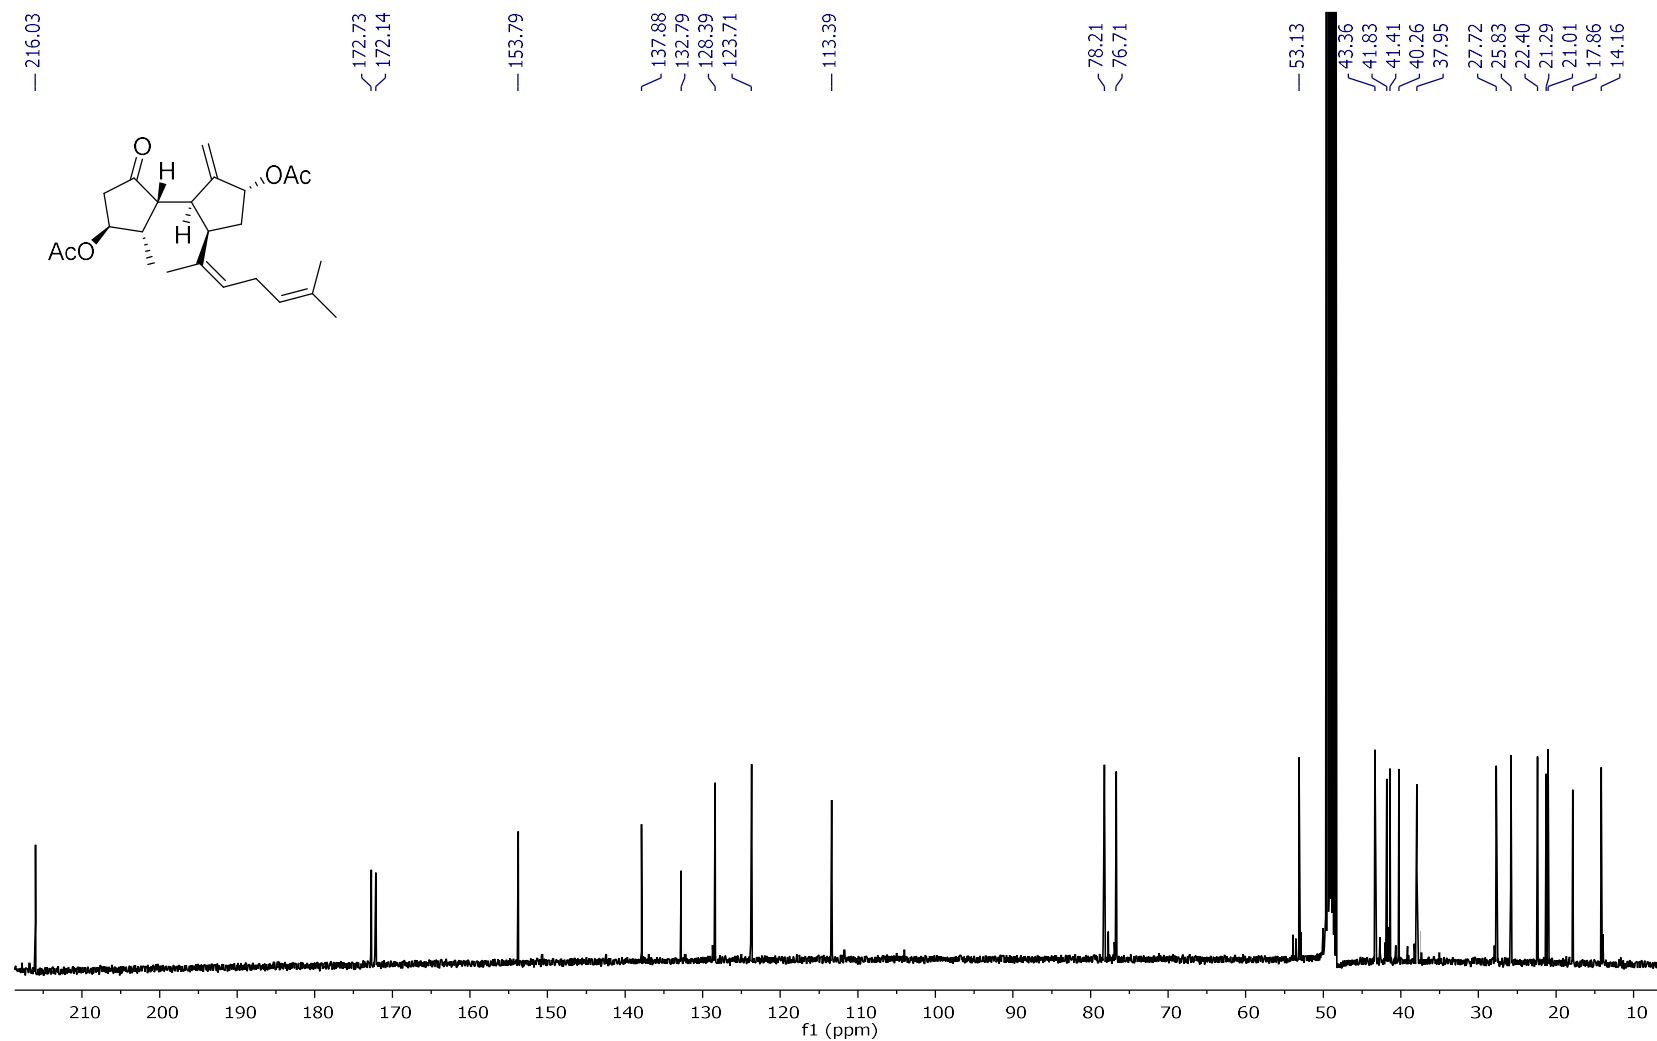

S14

Figure S14. <sup>13</sup>C NMR spectrum (125 MHz, CD<sub>3</sub>OD) of ruguloptone C (7)

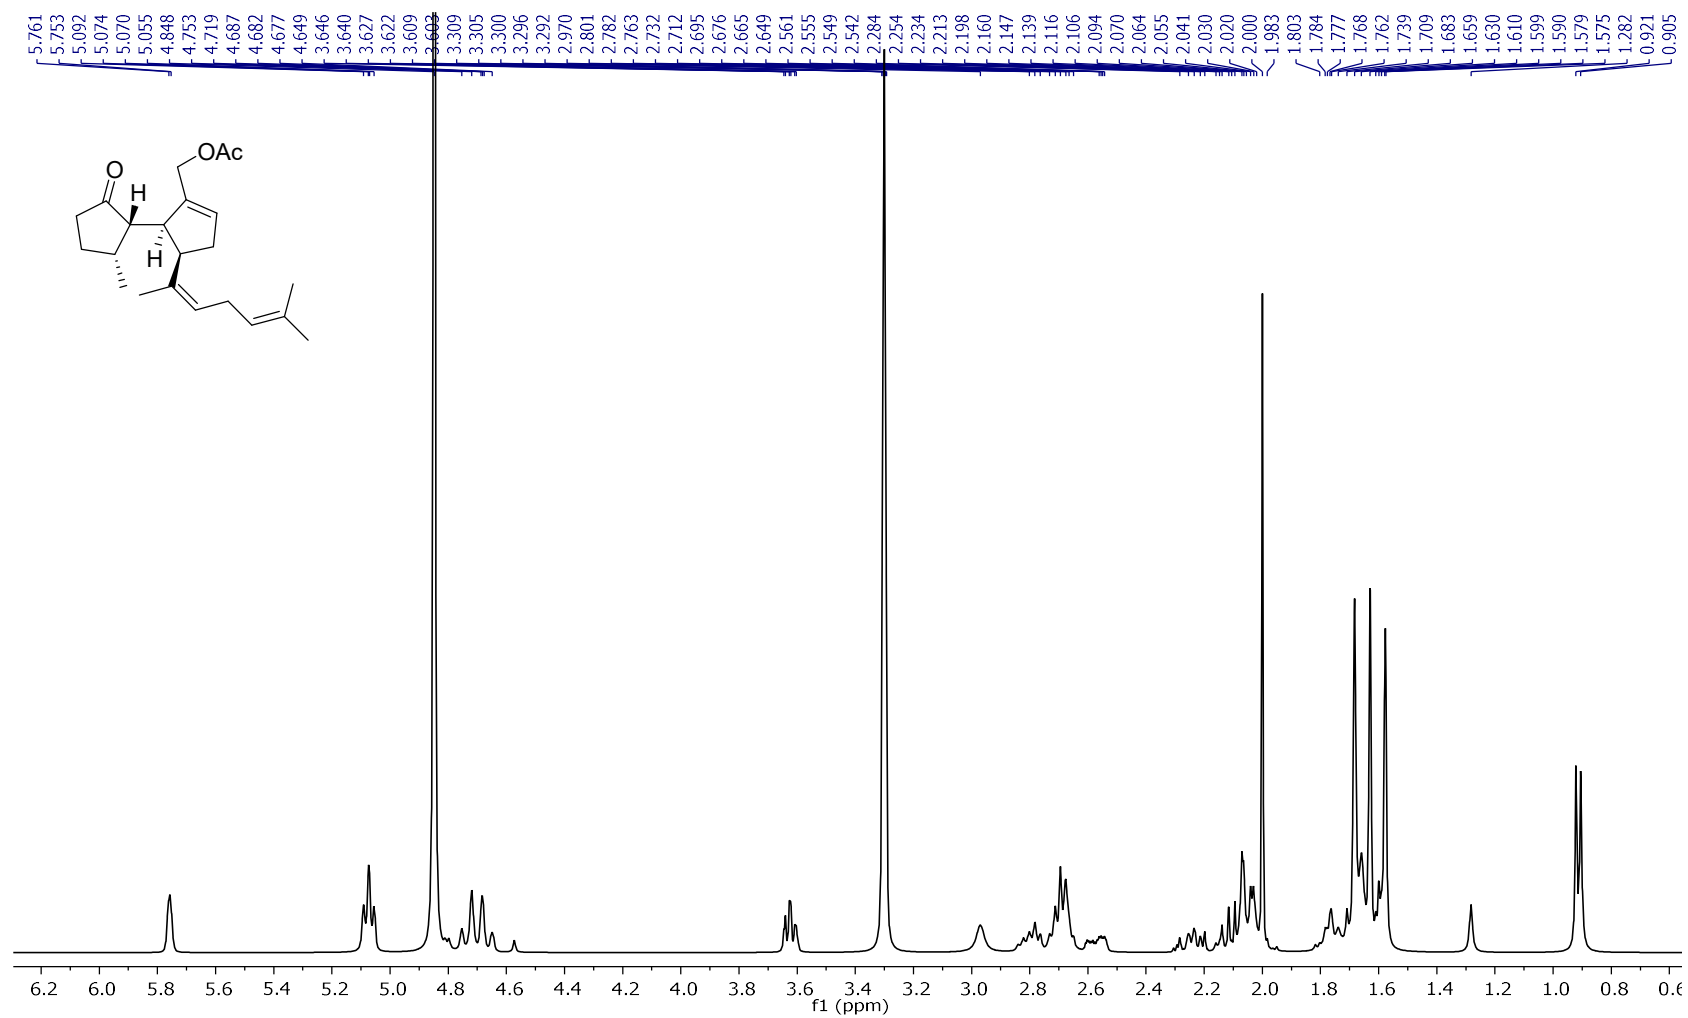

**Figure S15.**  $^1\text{H}$  NMR spectrum (500 MHz,  $\text{CD}_3\text{OD}$ ) of ruguloptone D (8)



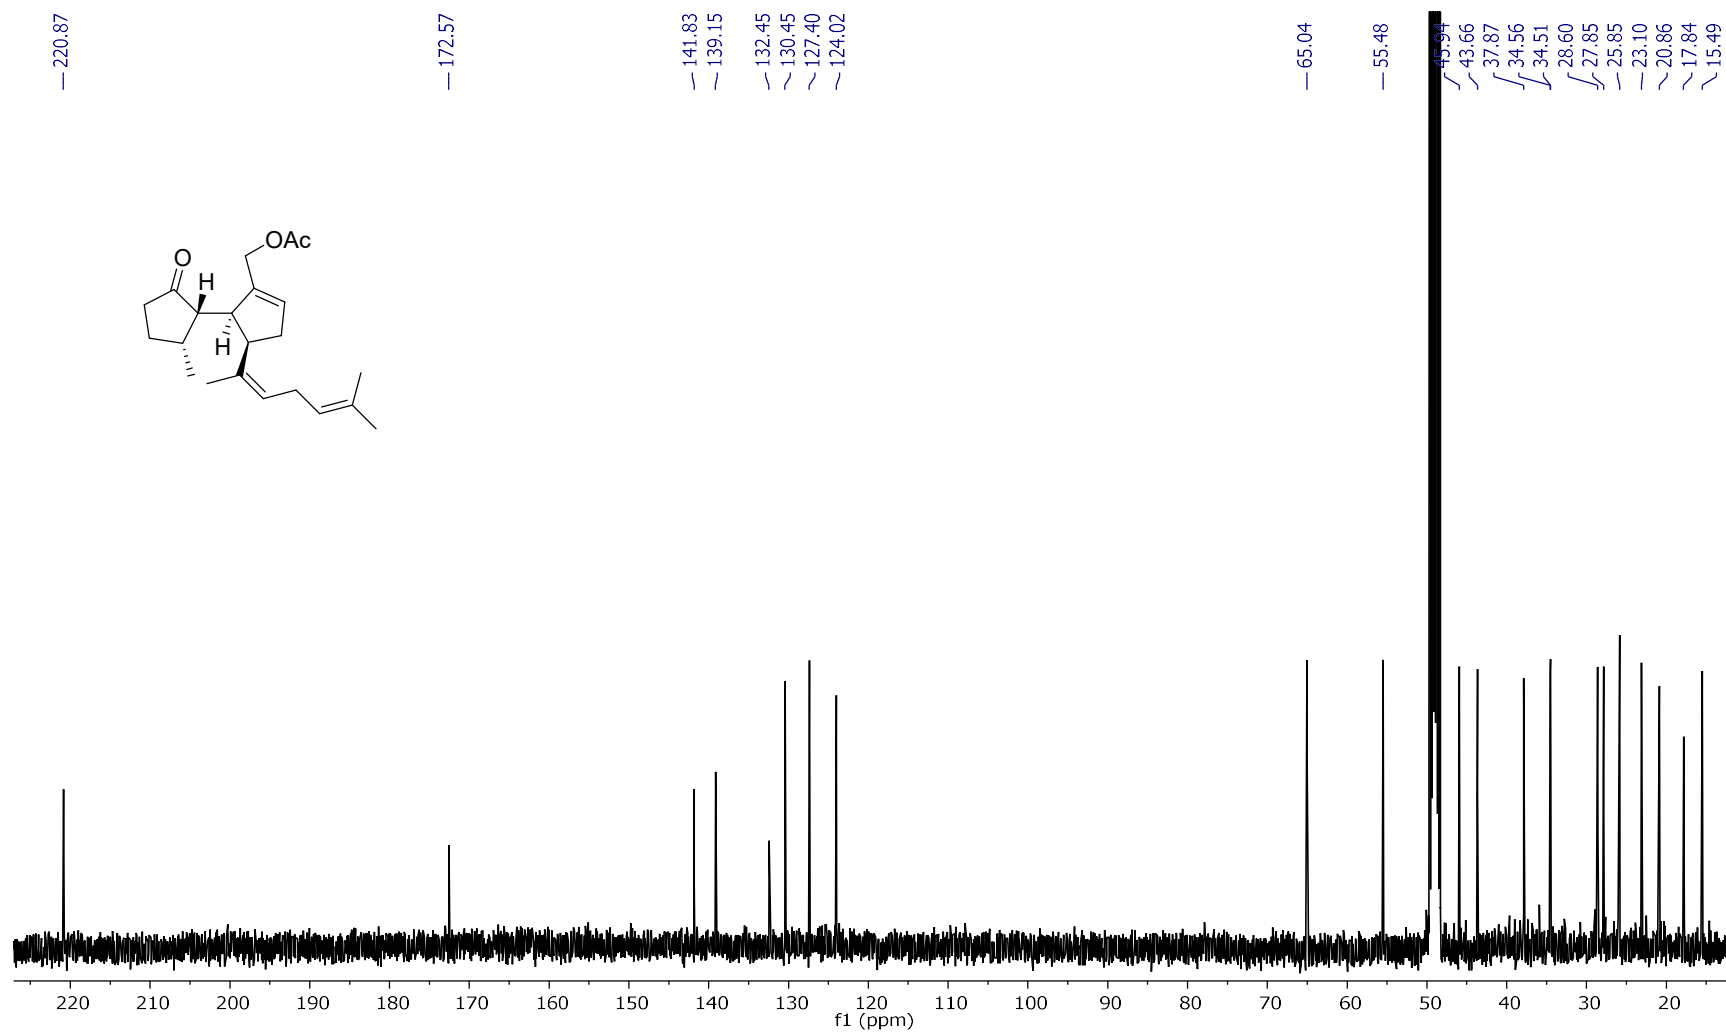

S16

Figure S16. <sup>13</sup>C NMR spectrum (125 MHz, CD<sub>3</sub>OD) of ruguloptone B (8)

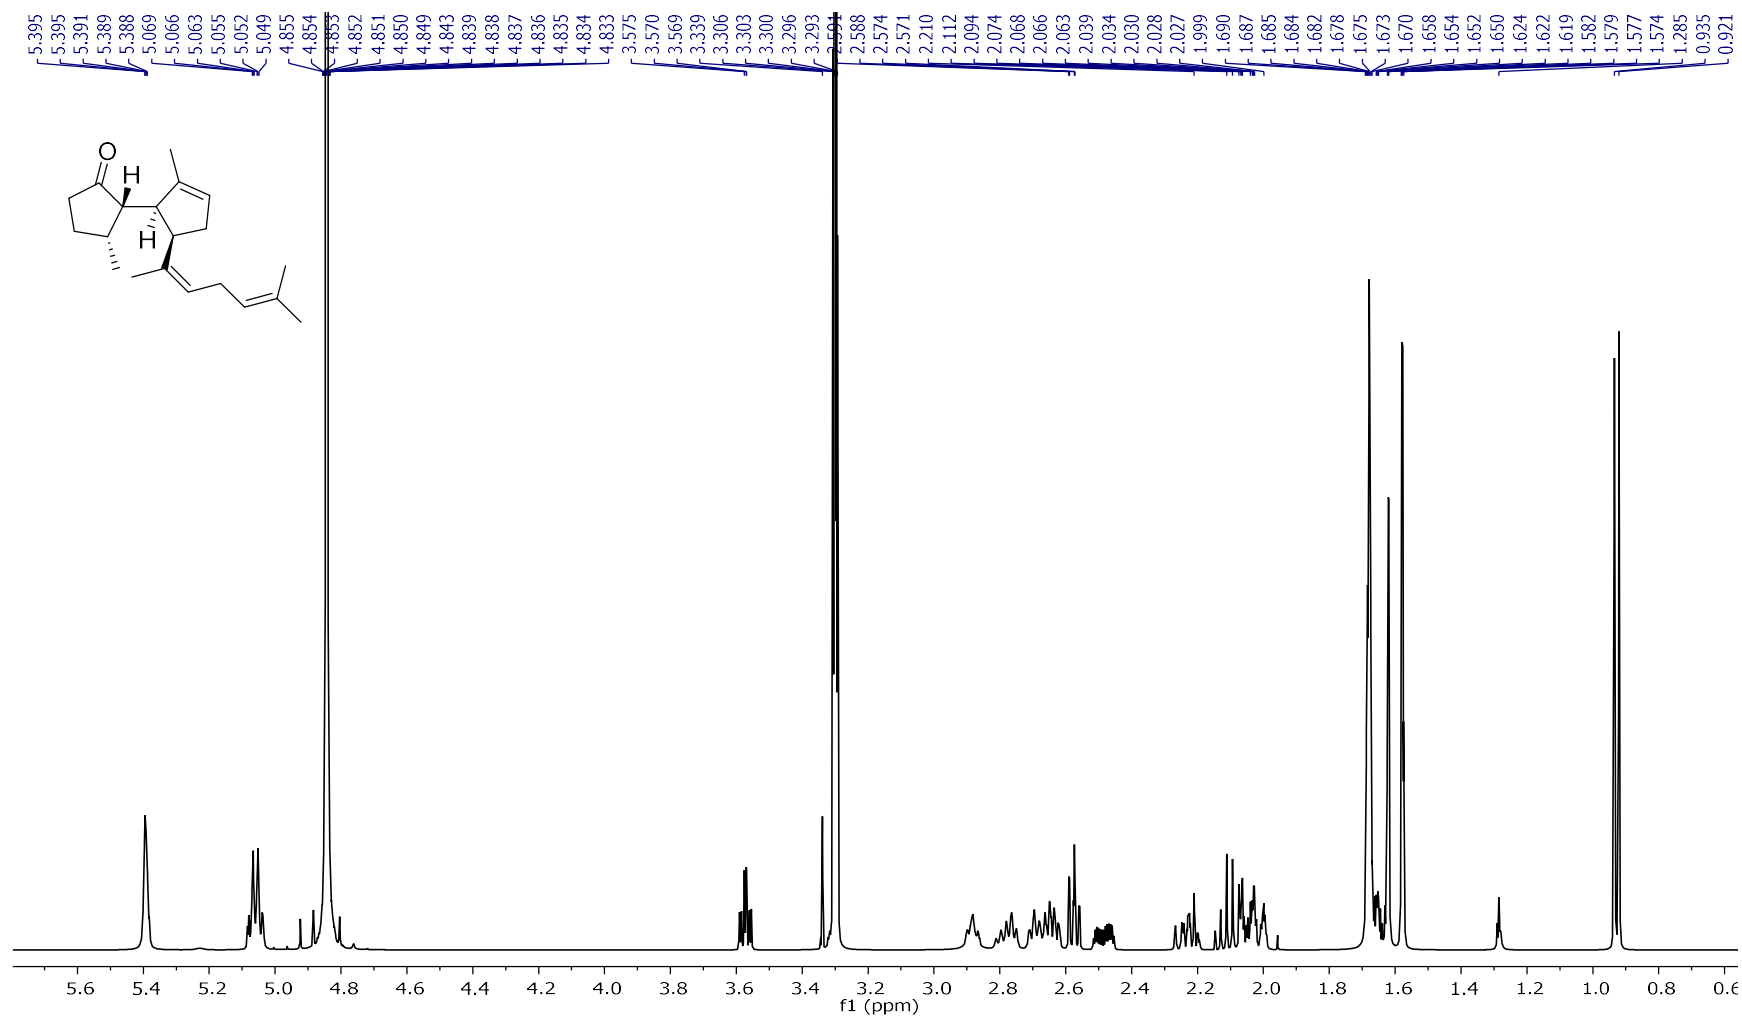

Figure S17.  $^1\text{H}$  NMR spectrum (500 MHz,  $\text{CD}_3\text{OD}$ ) of ruguloptone E (9)

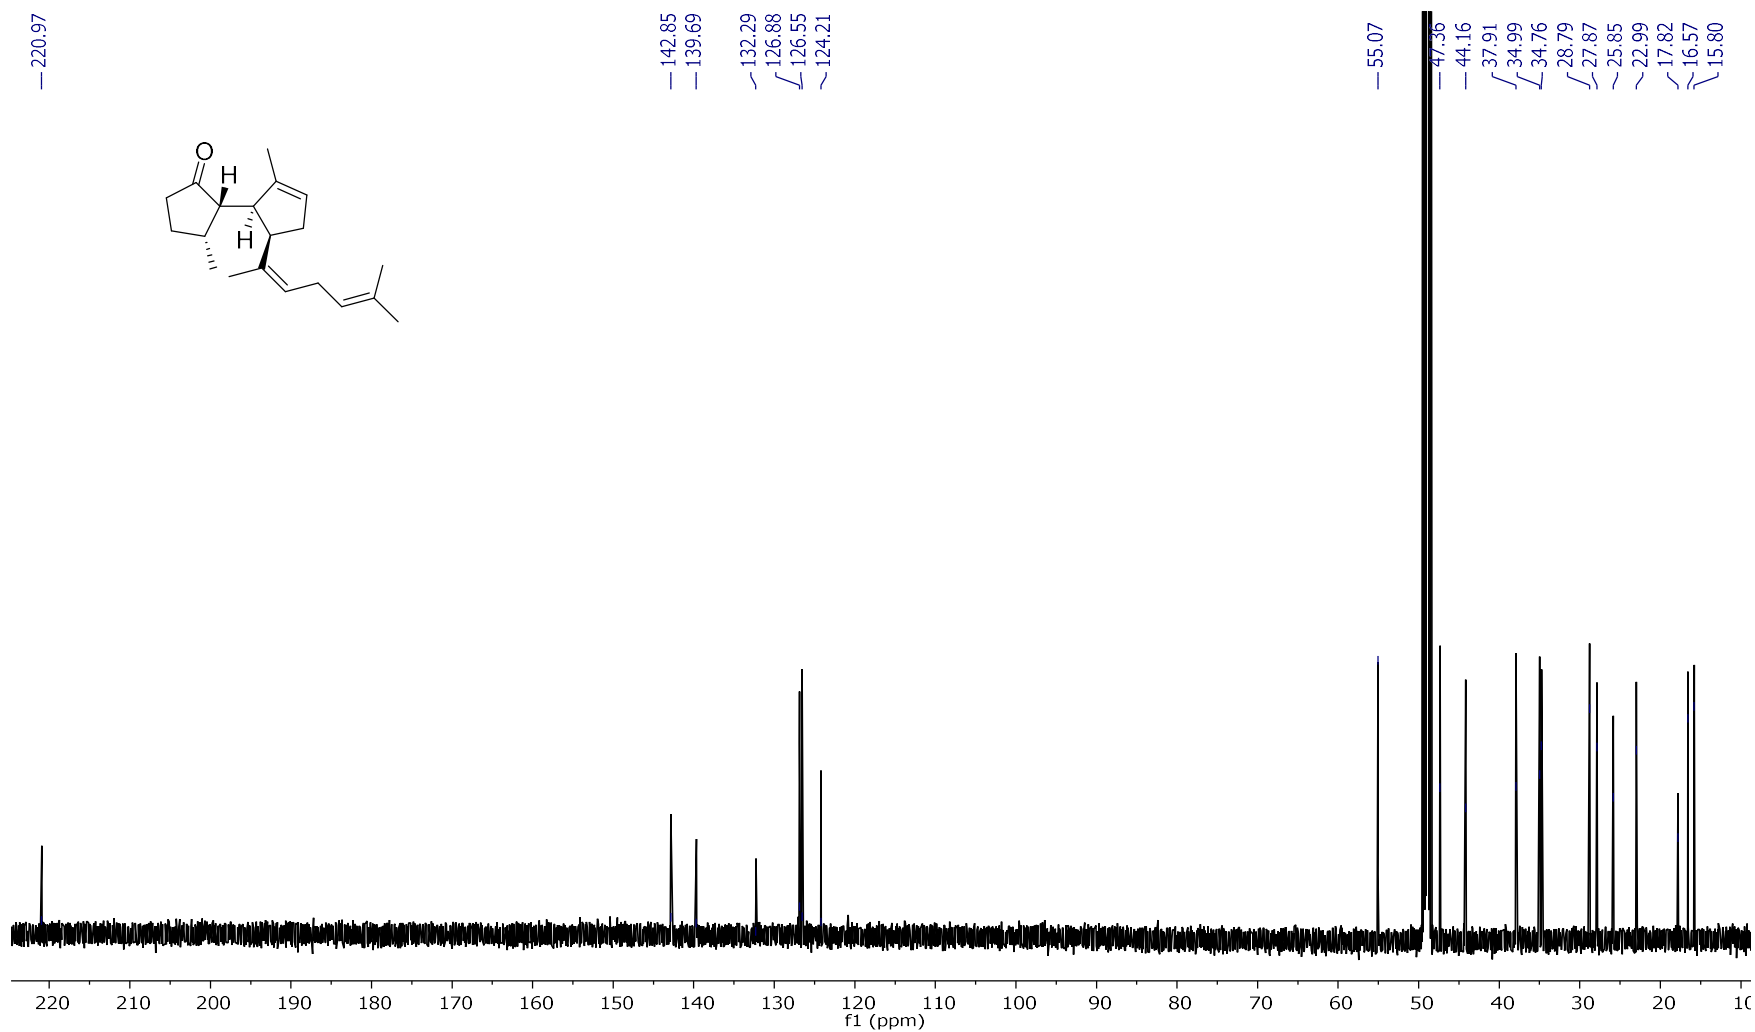

Figure S18. <sup>13</sup>C NMR spectrum (125 MHz, CD<sub>3</sub>OD) of ruguloptone E (9)

S19

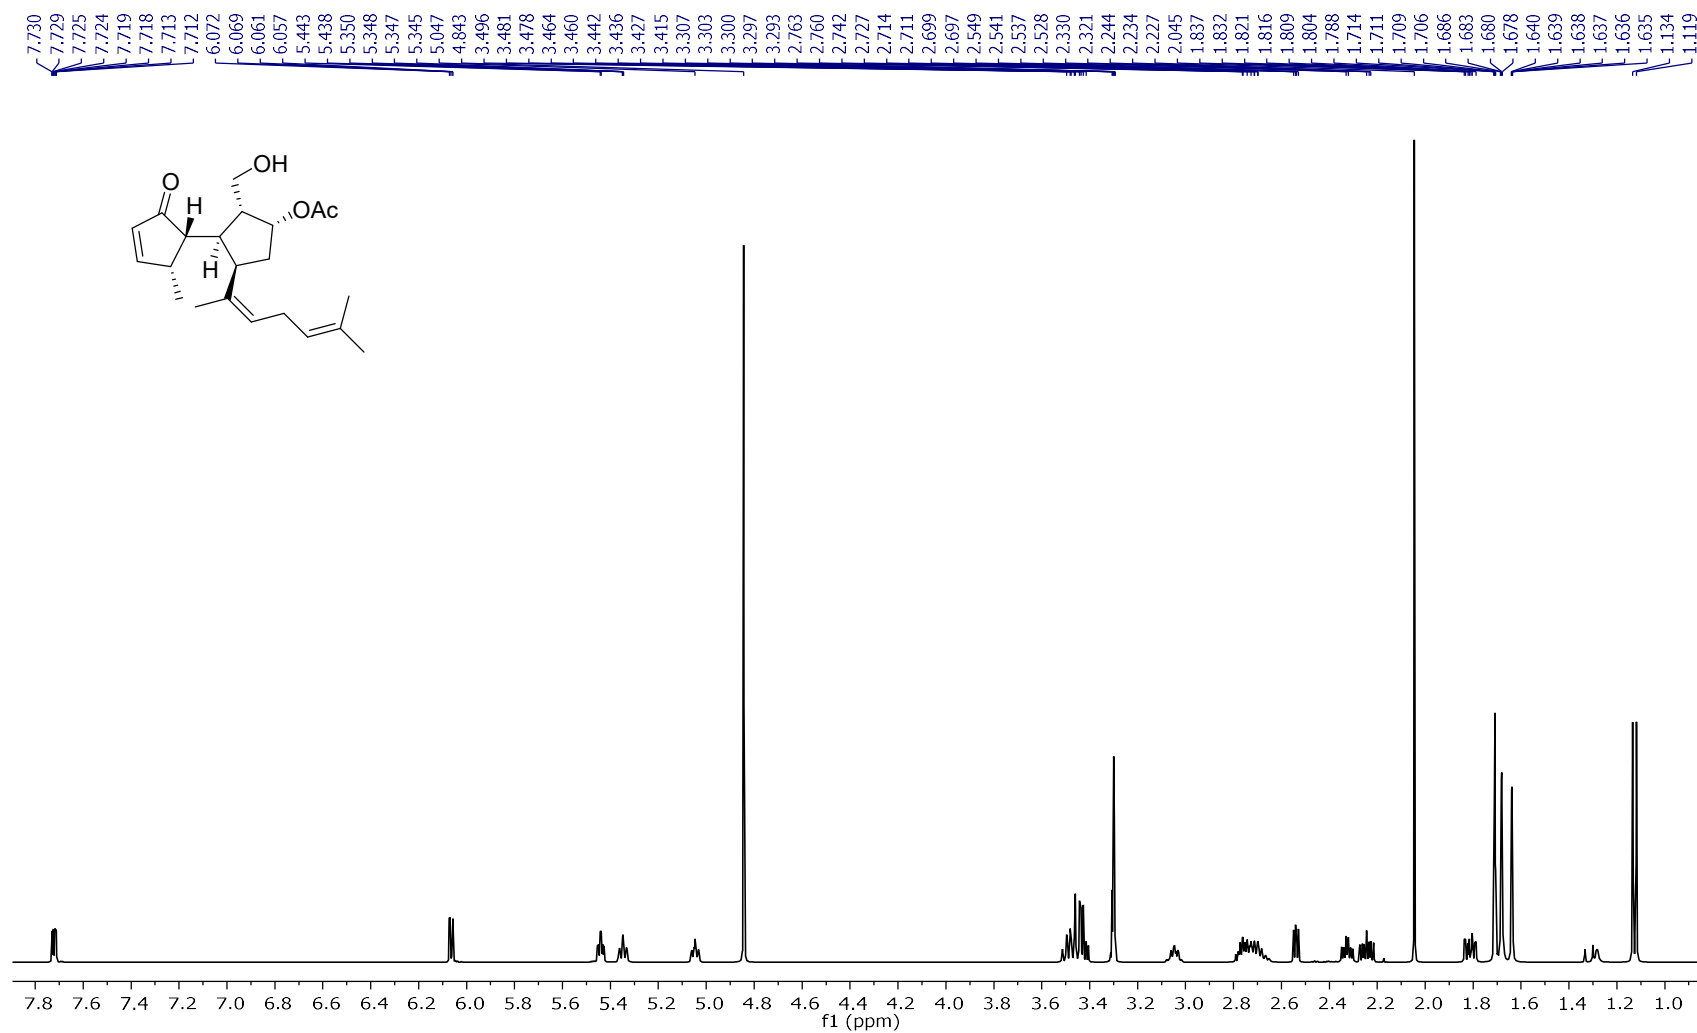

Figure S19. <sup>1</sup>H NMR spectrum (500 MHz, CD<sub>3</sub>OD) of ruguloptone F (10)

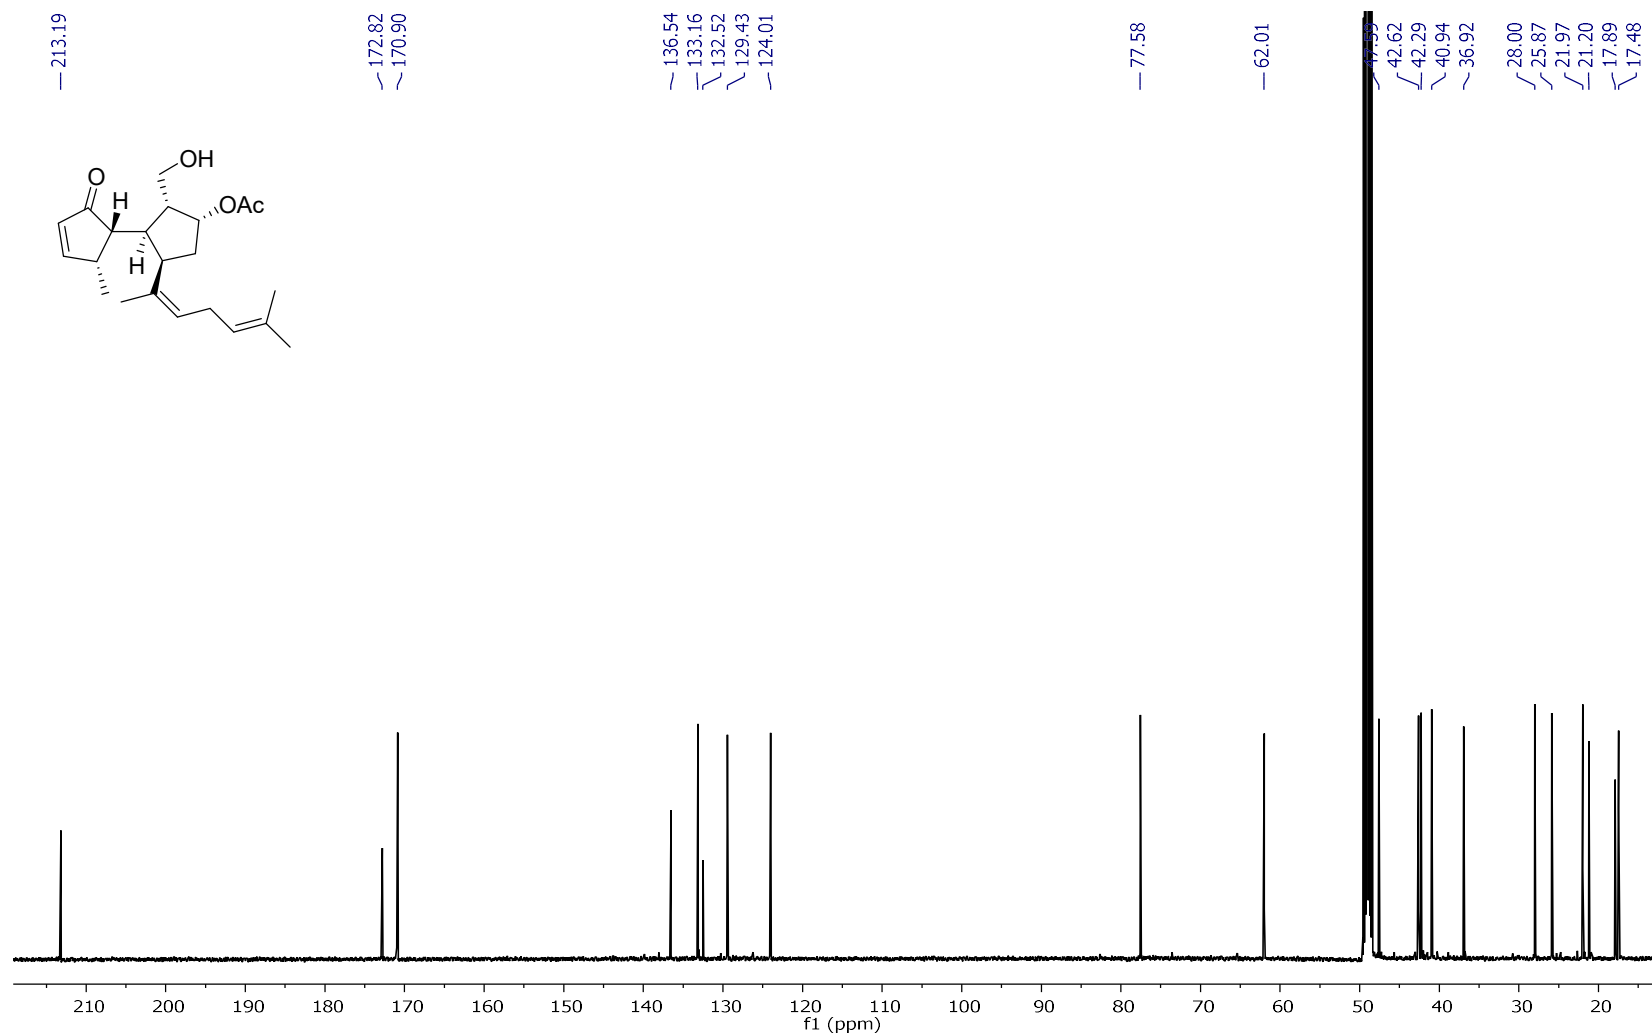

S20

Figure S20. <sup>13</sup>C NMR spectrum (125 MHz, CD<sub>3</sub>OD) of ruguloptone F (10)

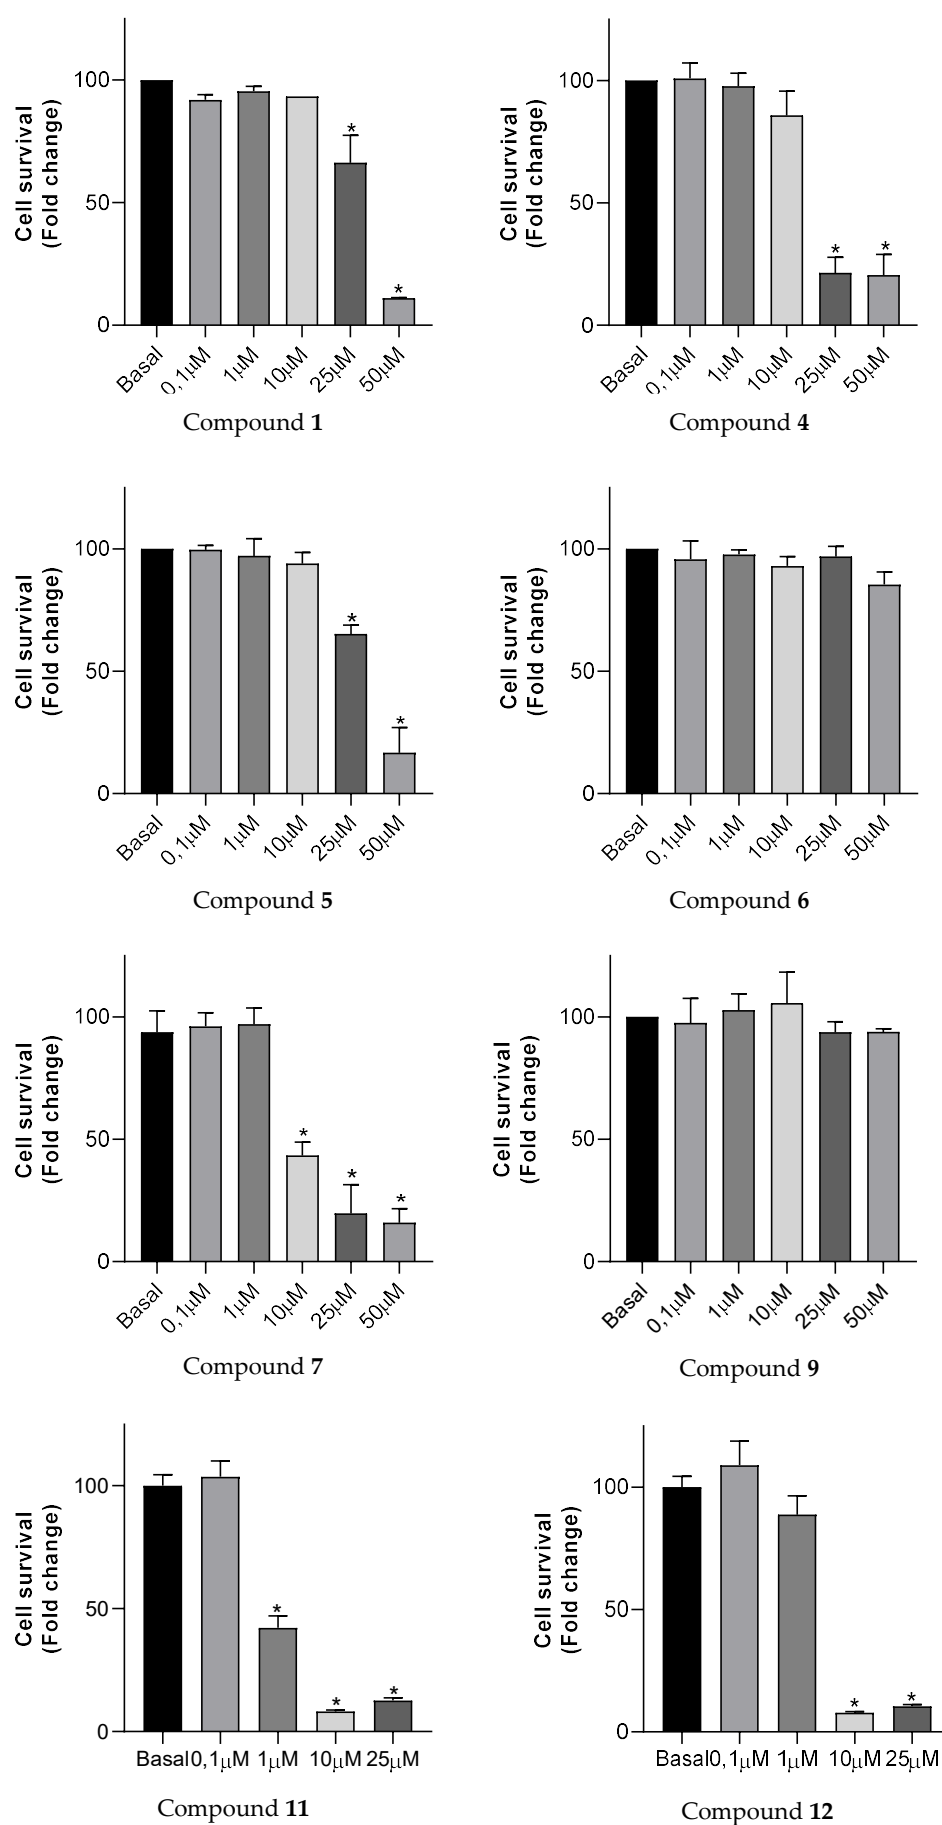

Figure S21. Dose-response cell viability of Bv.2 cells was determined by cristal violet assay. Colorimetric quantification was performed, and the results are mean  $\pm$  SD ( $n \geq 3$  independent experiments performed in duplicate). Significant differences were determined by two way ANOVA followed by Bonferroni t-test  $*p \leq 0.05$  vs Basal.

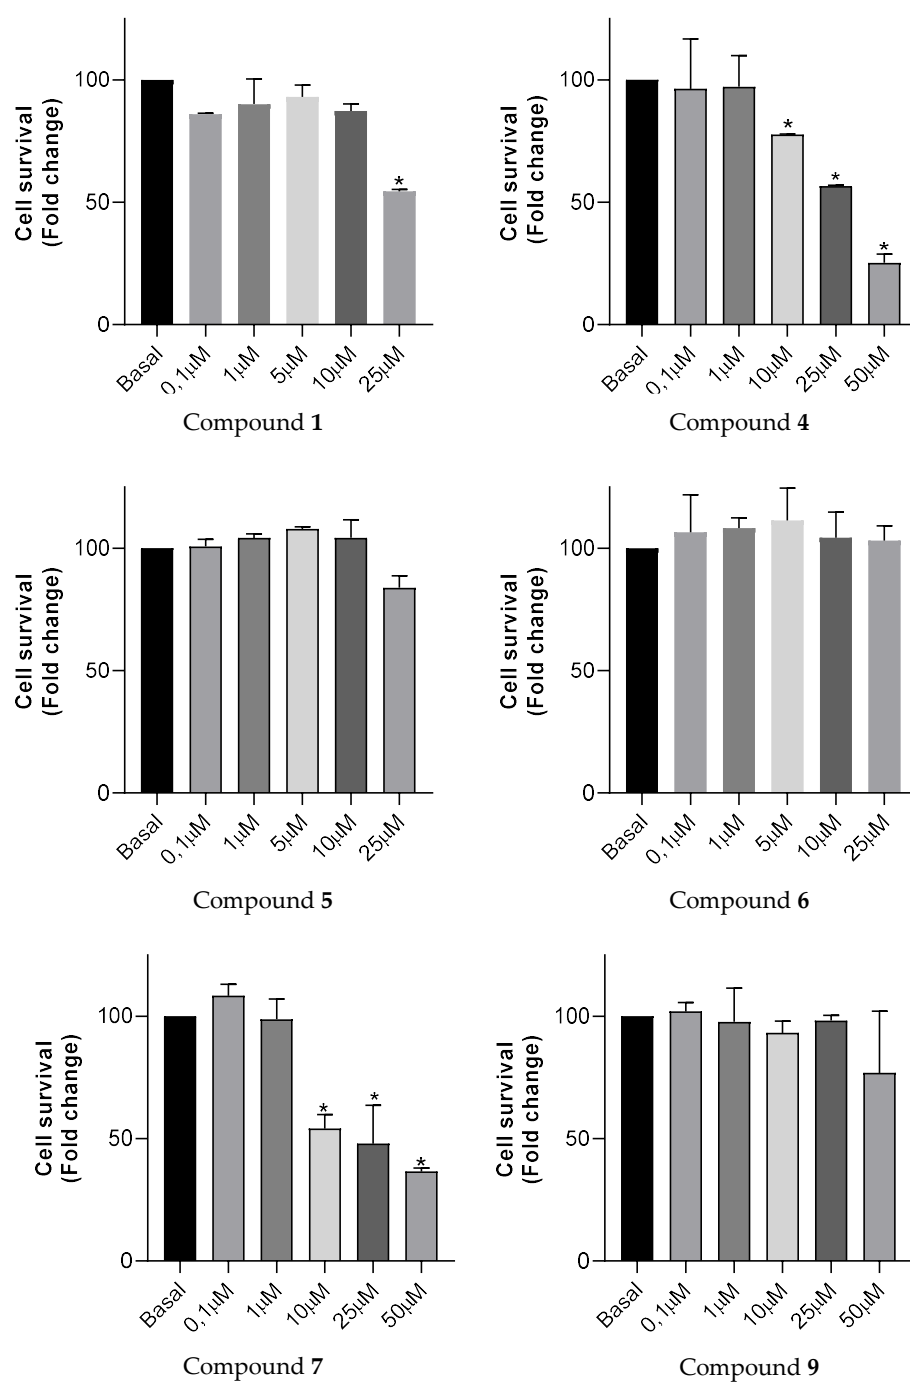

Figure S22. Dose-response cell viability of RAW 264.7 cells was determined by cristal violet assay. Colorimetric quantification was performed, and the results are mean  $\pm$  SD ( $n \geq 3$  independent experiments performed in duplicate). Significant differences were determined by two way ANOVA followed by Bonferroni t-test  $*p \leq 0.05$  vs Basal.
